# Supplementary material for: One-step preparation of anisotropic snowman-like poly(ionic liquid) microspheres via microwave-assisted dispersion polymerization
Source: Royal Society of Chemistry journal article supplement (doi:10.1039/d4py01053a), 2024-12-18
Supplement: d4py01053a1.pdf [file d4py01053a1.pdf]

## Supplementary Information

# One-step preparation of anisotropic snowman-like poly(ionic liquid) microspheres via microwave-assisted dispersion polymerization

Xufeng Hu<sup>a</sup>, Jingyi Li<sup>a</sup>, Xiaopeng Zhao<sup>a</sup> and Jianbo Yin<sup>a,b\*</sup>

<sup>a</sup> *Smart Materials Laboratory, Department of Applied Physics, School of Physical Science and Technology, Northwestern Polytechnical University, Xi'an, Shaanxi, 710129, China*

<sup>b</sup> *Shaanxi Basic Discipline (Liquid Physics) Research Center, School of Physical Science and Technology, Northwestern Polytechnical University, Xi'an, Shaanxi, 710129, China*

\* Corresponding Author.

E-mail: jbyin@nwpu.edu.cn

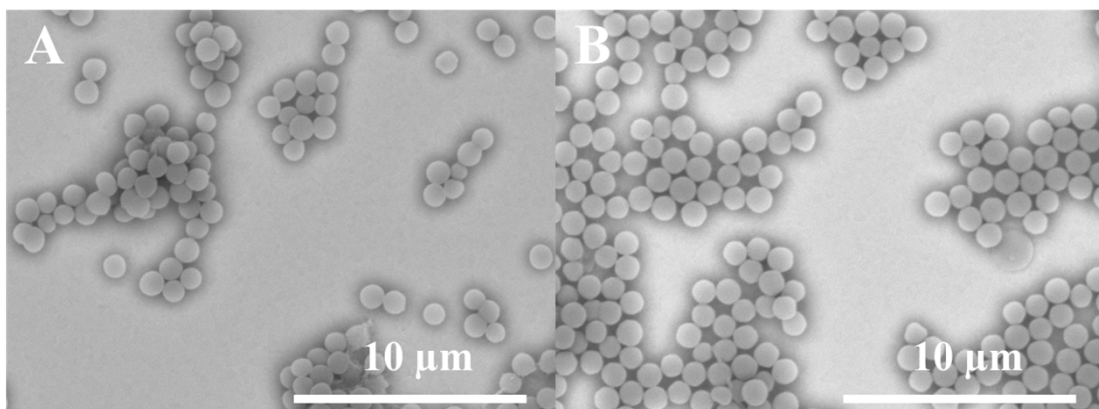

**Fig. S1** SEM images of PIL microspheres prepared via one-step microwave-assisted dispersion polymerization according to Formulation No. 1 in Table 1 with different amounts of DVB (A: 3.0  $\mu\text{L}$ , B: 4.0  $\mu\text{L}$ ) (1.5 g IL, 8.0 mg AIBN, 0.2 g PVP, 65  $^{\circ}\text{C}$ /60 min) after immersing in acetonitrile.

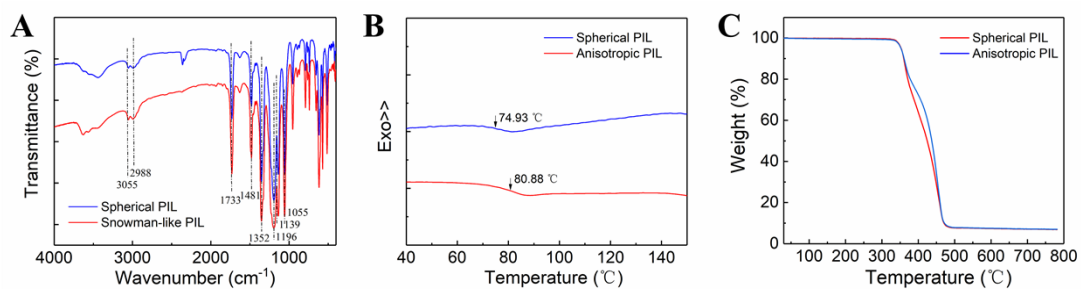

**Fig. S2** FT-IR spectra (A), DSC curves (B), and TGA curves (C) of the anisotropic snowman-like PIL microspheres prepared via one-step microwave-assisted dispersion polymerization (1.5 g IL, 3.0  $\mu$ L DVB, 8.0 mg AIBN, 0.2 g PVP, 65 °C/ 90min) and the normal spherical PIL microspheres prepared via one-step microwave-assisted dispersion polymerization without cross-linking agent (1.5 g IL, 8.0 mg AIBN, 0.2 g PVP, 65 °C/90 min).

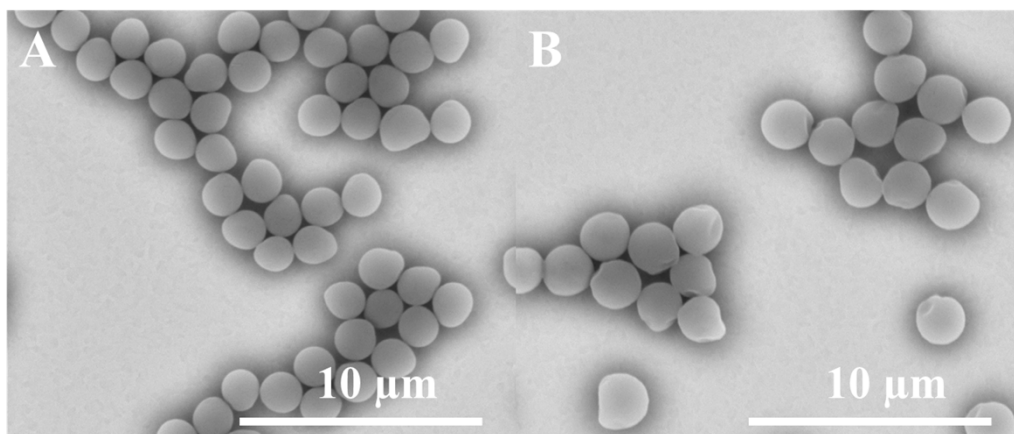

**Fig. S3** SEM images of PIL microspheres prepared via traditional dispersion polymerization in water bath at 70 °C (A) and 75 °C (B) (1.5 g IL, 3.0  $\mu$ L DVB, 8.0 mg AIBN, 0.2 g PVP, 12 h).

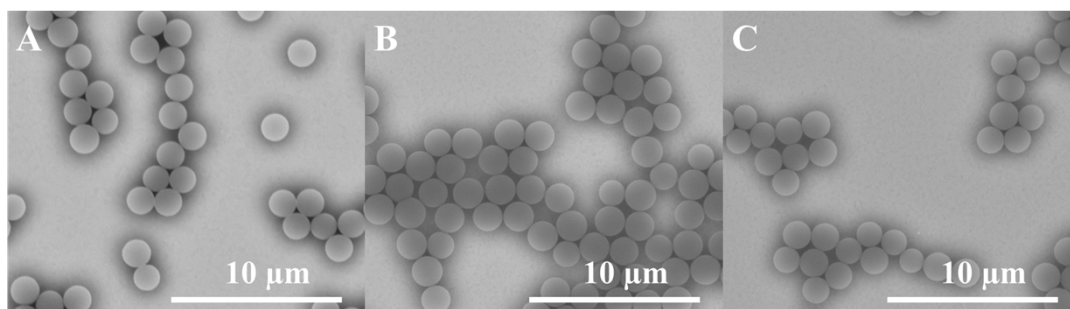

**Fig. S4** SEM images of PIL microspheres prepared via one-step microwave-assisted dispersion polymerization with MBA (5.0 mg) as cross-linking agent (A), EGDMA (5.0  $\mu\text{L}$ ) as cross-linking agent (B) and TEGDA (5.0  $\mu\text{L}$ ) as cross-linking agent (C) (1.5 g IL, 8.0 mg AIBN, 0.2 g PVP, 65  $^{\circ}\text{C}$ / 90 min).

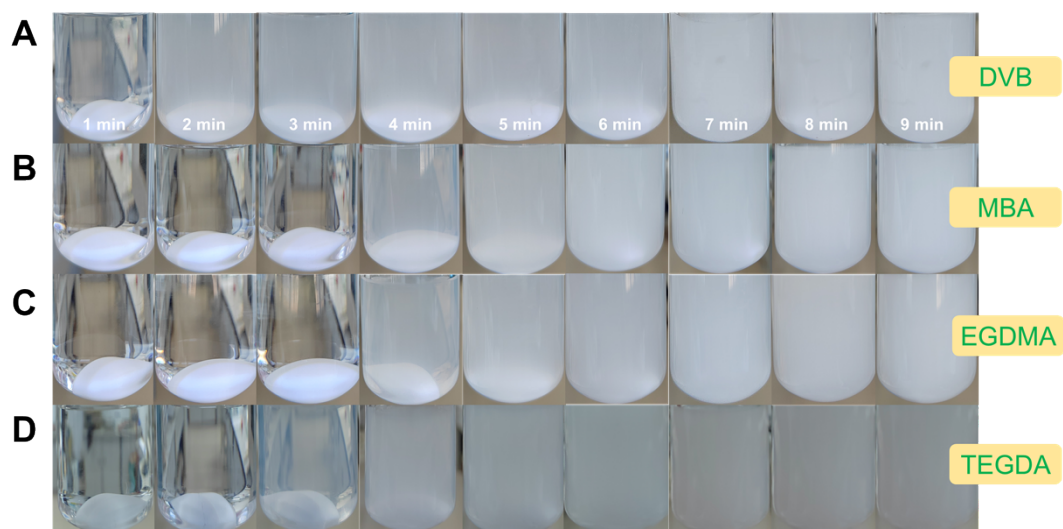

**Fig. S5** The photos of solution state after different times of microwave irradiation during preparation via one-step microwave-assisted dispersion polymerization with different cross-linking agents (A: 3.0  $\mu\text{L}$  DVB, B: 5.0 mg MBA, C: 5.0  $\mu\text{L}$  EGDMA, D: 5.0  $\mu\text{L}$  TEGDA) (1.5 g IL, 8.0 mg AIBN, 0.2 g PVP, 65  $^{\circ}\text{C}$ ).

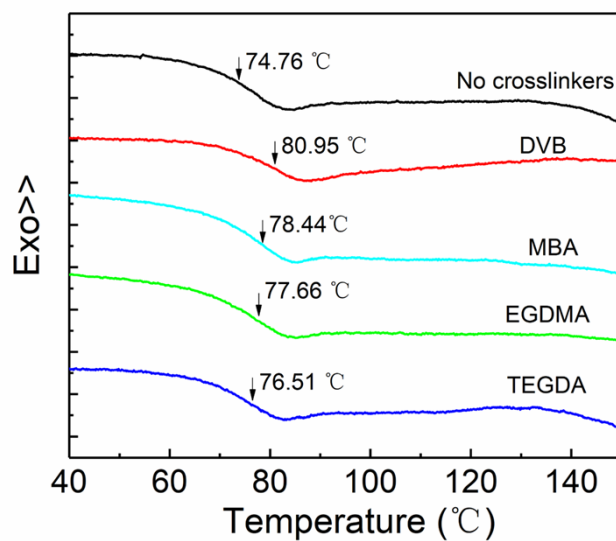

**Fig. S6** DSC curves of the PIL microspheres prepared via one-step microwave-assisted dispersion polymerization with different cross-linking agents (3.0  $\mu$ L DVB, 5.0 mg MBA, 5.0  $\mu$ L EGDMA, 5.0  $\mu$ L TEGDA) (1.5 g IL, 8.0 mg AIBN, 0.2 g PVP, 65 °C/90 min).

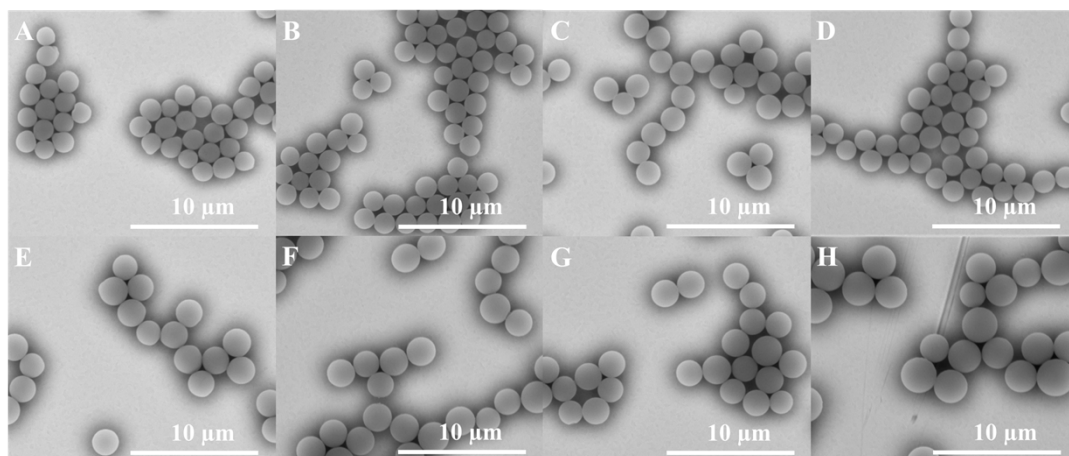

**Fig. S7** SEM images of PIL microspheres prepared via one-step microwave-assisted dispersion polymerization with different cross-linking agents (A and E: 3.0  $\mu\text{L}$  DVB, B and F: 5.0 mg MBA, C and G: 5.0  $\mu\text{L}$  EGDMA, D and H: 5.0  $\mu\text{L}$  TEGDA) at 70  $^{\circ}\text{C}$  (A-D) and 75  $^{\circ}\text{C}$  (E-H) (1.5 g IL, 8.0 mg AIBN, 0.2 g PVP, 90 min).



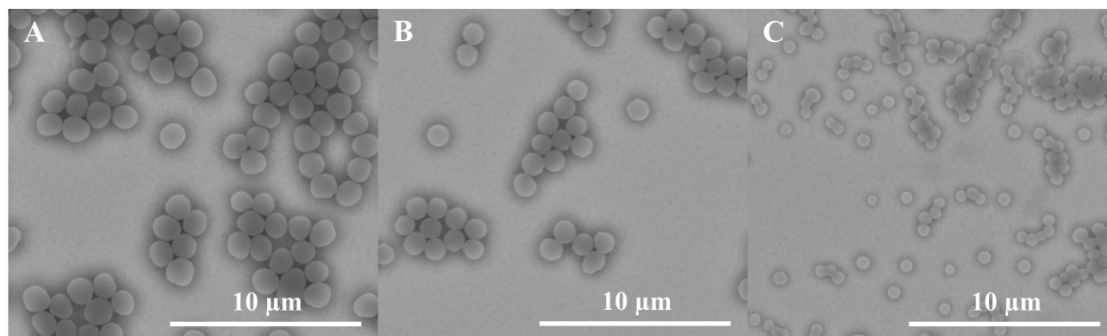

**Fig. S8** SEM images of PIL microspheres prepared via one-step microwave-assisted dispersion polymerization in different solvents (A: 98% EtOH + 2% water (12.5 mL); B: 95% EtOH + 5% water (12.5 mL); C: 90% EtOH + 10% MeOH (12.5 mL)) (1.5 g IL, 4.0  $\mu$ L DVB, 8.0 mg AIBN, 0.2 g PVP, 65  $^{\circ}$ C/90 min).

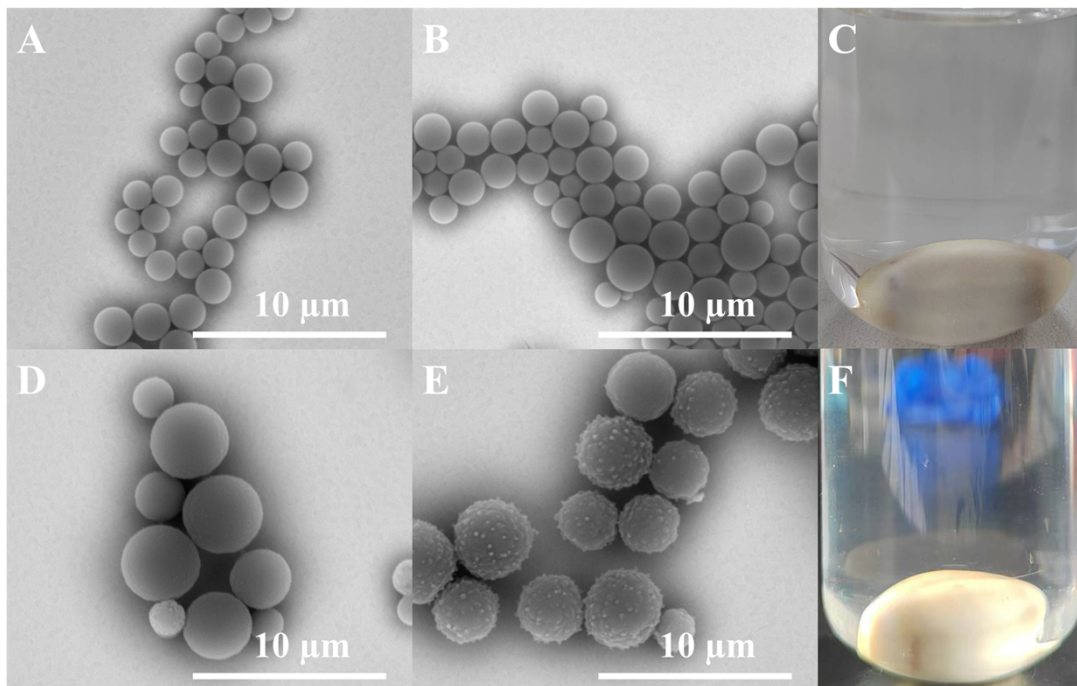

**Fig. S9.** SEM images of polystyrene microspheres prepared via the one-step microwave-assisted dispersion polymerization at 65 °C (A) and 70 °C (B) (1.5 g St, 3.0  $\mu$ L DVB, 8.0 mg AIBN, 0.2 g PVP) and the photo of corresponding solution containing St monomer after 10 min of microwave irradiation at 65°C (C); SEM images of poly(methyl methacrylate) microspheres prepared via the one-step microwave-assisted dispersion polymerization at 65 °C (D) and 70 °C (E) (1.5 g MMA, 3.0  $\mu$ L DVB, 8.0 mg AIBN, 0.2 g PVP) and the photo of corresponding solution containing MMA monomer after 30 min of microwave irradiation at 65°C (F).

## Raw DSC data for Fig. 4B and Fig. S2B

| Temperature | 10 min   | Temperature | 20 min   | Temperature | 30 min   | Temperature | 45 min   |
|-------------|----------|-------------|----------|-------------|----------|-------------|----------|
| ...         | ...      | ...         | ...      | ....        | ...      | ...         | ...      |
| 43.57672    | -0.05786 | 57.01033    | -0.10724 | 61.27652    | -0.16807 | 70.7433     | -0.22856 |
| 43.61       | -0.05785 | 57.04364    | -0.10726 | 61.30987    | -0.16809 | 70.77662    | -0.22861 |
| 43.6433     | -0.05785 | 57.07697    | -0.10729 | 61.34321    | -0.16811 | 70.80995    | -0.22865 |
| 43.67656    | -0.05784 | 57.1103     | -0.10731 | 61.37656    | -0.16813 | 70.84331    | -0.22869 |
| 43.70985    | -0.05783 | 57.14359    | -0.10733 | 61.4099     | -0.16815 | 70.87664    | -0.22873 |
| 43.74315    | -0.05782 | 57.1769     | -0.10735 | 61.44326    | -0.16817 | 70.90998    | -0.22878 |
| 43.77641    | -0.05781 | 57.21018    | -0.10737 | 61.47659    | -0.16819 | 70.9433     | -0.22882 |
| 43.8097     | -0.0578  | 57.24349    | -0.10739 | 61.50995    | -0.16822 | 70.97659    | -0.22886 |
| 43.843      | -0.05779 | 57.27679    | -0.10741 | 61.5433     | -0.16824 | 71.0099     | -0.22891 |
| 43.87629    | -0.05778 | 57.3101     | -0.10743 | 61.57666    | -0.16826 | 71.04321    | -0.22895 |
| 43.90961    | -0.05777 | 57.34341    | -0.10744 | 61.60998    | -0.16828 | 71.07651    | -0.229   |
| 43.9429     | -0.05776 | 57.37669    | -0.10746 | 61.64334    | -0.1683  | 71.1098     | -0.22904 |
| 43.9762     | -0.05775 | 57.41       | -0.10748 | 61.67669    | -0.16832 | 71.14315    | -0.22909 |
| 44.00951    | -0.05774 | 57.4433     | -0.1075  | 61.71002    | -0.16835 | 71.17651    | -0.22913 |
| 44.04282    | -0.05773 | 57.47661    | -0.10752 | 61.74334    | -0.16837 | 71.20985    | -0.22918 |
| 44.07608    | -0.05771 | 57.50989    | -0.10754 | 61.77666    | -0.16839 | 71.2432     | -0.22923 |
| 44.10938    | -0.0577  | 57.5432     | -0.10756 | 61.81002    | -0.16841 | 71.27656    | -0.22927 |
| 44.1427     | -0.05769 | 57.57654    | -0.10758 | 61.84331    | -0.16844 | 71.30993    | -0.22932 |
| 44.17602    | -0.05768 | 57.60985    | -0.1076  | 61.87662    | -0.16846 | 71.3433     | -0.22936 |
| 44.20934    | -0.05767 | 57.64318    | -0.10761 | 61.90997    | -0.16848 | 71.37664    | -0.22941 |
| 44.24267    | -0.05766 | 57.67651    | -0.10763 | 61.9433     | -0.16851 | 71.41002    | -0.22946 |
| 44.27597    | -0.05765 | 57.70982    | -0.10765 | 61.97662    | -0.16853 | 71.44339    | -0.22951 |
| 44.30925    | -0.05764 | 57.74313    | -0.10767 | 62.00997    | -0.16856 | 71.47677    | -0.22955 |
| 44.34256    | -0.05763 | 57.77643    | -0.10769 | 62.04333    | -0.16858 | 71.51015    | -0.2296  |
| 44.37587    | -0.05763 | 57.80972    | -0.10771 | 62.07664    | -0.1686  | 71.54351    | -0.22965 |
| 44.40918    | -0.05762 | 57.84302    | -0.10772 | 62.10997    | -0.16863 | 71.57687    | -0.2297  |
| 44.44249    | -0.05761 | 57.87634    | -0.10774 | 62.14328    | -0.16865 | 71.61025    | -0.22974 |
| 44.47585    | -0.0576  | 57.90962    | -0.10776 | 62.17661    | -0.16868 | 71.64361    | -0.22979 |
| 44.50921    | -0.0576  | 57.94295    | -0.10778 | 62.20992    | -0.1687  | 71.67695    | -0.22984 |
| 44.54254    | -0.05759 | 57.97626    | -0.1078  | 62.24325    | -0.16873 | 71.71031    | -0.22989 |
| 44.57587    | -0.05759 | 58.00959    | -0.10782 | 62.27657    | -0.16875 | 71.74364    | -0.22993 |
| 44.60921    | -0.05758 | 58.04287    | -0.10784 | 62.3099     | -0.16878 | 71.77698    | -0.22998 |
| 44.64254    | -0.05758 | 58.07615    | -0.10786 | 62.34325    | -0.1688  | 71.81033    | -0.23003 |
| 44.67584    | -0.05758 | 58.10948    | -0.10788 | 62.37659    | -0.16883 | 71.84367    | -0.23008 |
| 44.7092     | -0.05758 | 58.14275    | -0.1079  | 62.4099     | -0.16886 | 71.87702    | -0.23013 |
| 44.74256    | -0.05758 | 58.17607    | -0.10792 | 62.44323    | -0.16888 | 71.91034    | -0.23017 |
| 44.77592    | -0.05758 | 58.20938    | -0.10794 | 62.47656    | -0.16891 | 71.94367    | -0.23022 |
| 44.80926    | -0.05758 | 58.24269    | -0.10796 | 62.50987    | -0.16893 | 71.97698    | -0.23027 |
| 44.84261    | -0.05758 | 58.27602    | -0.10798 | 62.54318    | -0.16896 | 72.01033    | -0.23031 |

|          |          |          |          |          |          |          |          |
|----------|----------|----------|----------|----------|----------|----------|----------|
| 44.87595 | -0.05758 | 58.30934 | -0.108   | 62.57648 | -0.16899 | 72.04369 | -0.23036 |
| 44.9093  | -0.05759 | 58.34267 | -0.10802 | 62.60982 | -0.16902 | 72.07705 | -0.23041 |
| 44.94264 | -0.05759 | 58.37605 | -0.10804 | 62.64316 | -0.16904 | 72.11038 | -0.23045 |
| 44.976   | -0.0576  | 58.40939 | -0.10807 | 62.67649 | -0.16907 | 72.14372 | -0.2305  |
| 45.00936 | -0.05761 | 58.44277 | -0.10809 | 62.70985 | -0.1691  | 72.17702 | -0.23055 |
| 45.0427  | -0.05762 | 58.47611 | -0.10811 | 62.74321 | -0.16912 | 72.21036 | -0.23059 |
| 45.07608 | -0.05763 | 58.50946 | -0.10814 | 62.77656 | -0.16915 | 72.24369 | -0.23064 |
| 45.10946 | -0.05764 | 58.54282 | -0.10816 | 62.80992 | -0.16918 | 72.27703 | -0.23069 |
| 45.14285 | -0.05765 | 58.57618 | -0.10818 | 62.84328 | -0.16921 | 72.31033 | -0.23073 |
| 45.17623 | -0.05766 | 58.60954 | -0.10821 | 62.87664 | -0.16924 | 72.34367 | -0.23078 |
| 45.20959 | -0.05768 | 58.6429  | -0.10823 | 62.91    | -0.16926 | 72.37702 | -0.23082 |
| 45.24295 | -0.05769 | 58.67629 | -0.10826 | 62.94334 | -0.16929 | 72.41038 | -0.23087 |
| 45.27633 | -0.05771 | 58.70969 | -0.10828 | 62.97667 | -0.16932 | 72.44371 | -0.23091 |
| 45.3097  | -0.05772 | 58.74305 | -0.10831 | 63.01003 | -0.16935 | 72.47702 | -0.23096 |
| 45.34307 | -0.05774 | 58.77644 | -0.10834 | 63.04336 | -0.16938 | 72.51036 | -0.231   |
| 45.37643 | -0.05776 | 58.8098  | -0.10837 | 63.07669 | -0.16941 | 72.54369 | -0.23104 |
| 45.40979 | -0.05778 | 58.8432  | -0.10839 | 63.11003 | -0.16944 | 72.577   | -0.23109 |
| 45.44315 | -0.0578  | 58.87656 | -0.10842 | 63.14341 | -0.16946 | 72.6103  | -0.23113 |
| 45.47651 | -0.05783 | 58.90993 | -0.10845 | 63.17675 | -0.16949 | 72.64357 | -0.23118 |
| 45.50987 | -0.05785 | 58.94331 | -0.10848 | 63.21008 | -0.16952 | 72.67685 | -0.23122 |
| 45.5432  | -0.05788 | 58.97667 | -0.10851 | 63.24343 | -0.16955 | 72.71013 | -0.23126 |
| 45.57654 | -0.0579  | 59.01005 | -0.10854 | 63.27675 | -0.16958 | 72.74341 | -0.23131 |
| 45.60992 | -0.05793 | 59.04341 | -0.10857 | 63.31007 | -0.16961 | 72.77671 | -0.23135 |
| 45.64333 | -0.05795 | 59.07675 | -0.1086  | 63.34339 | -0.16964 | 72.81    | -0.23139 |
| 45.6767  | -0.05798 | 59.11011 | -0.10863 | 63.3767  | -0.16967 | 72.8433  | -0.23143 |
| 45.71011 | -0.05801 | 59.14348 | -0.10866 | 63.41003 | -0.1697  | 72.87661 | -0.23148 |
| 45.74346 | -0.05804 | 59.17682 | -0.10869 | 63.44334 | -0.16973 | 72.90993 | -0.23152 |
| 45.77682 | -0.05807 | 59.21015 | -0.10872 | 63.47666 | -0.16975 | 72.94328 | -0.23156 |
| 45.8102  | -0.0581  | 59.24352 | -0.10876 | 63.50998 | -0.16978 | 72.97664 | -0.2316  |
| 45.84357 | -0.05814 | 59.27685 | -0.10879 | 63.54331 | -0.16981 | 73.01002 | -0.23165 |
| 45.87695 | -0.05817 | 59.31021 | -0.10882 | 63.57667 | -0.16984 | 73.04336 | -0.23169 |
| 45.91036 | -0.0582  | 59.34356 | -0.10886 | 63.61002 | -0.16987 | 73.07669 | -0.23173 |
| 45.94372 | -0.05824 | 59.37689 | -0.10889 | 63.64338 | -0.1699  | 73.11003 | -0.23177 |
| 45.9771  | -0.05827 | 59.41021 | -0.10892 | 63.67674 | -0.16993 | 73.14336 | -0.23181 |
| 46.01048 | -0.05831 | 59.44356 | -0.10896 | 63.71008 | -0.16996 | 73.17669 | -0.23186 |
| 46.04384 | -0.05834 | 59.47689 | -0.10899 | 63.74343 | -0.16999 | 73.20998 | -0.2319  |
| 46.07718 | -0.05838 | 59.51023 | -0.10903 | 63.77677 | -0.17002 | 73.2433  | -0.23194 |
| 46.11056 | -0.05842 | 59.54359 | -0.10906 | 63.81011 | -0.17005 | 73.27662 | -0.23198 |
| 46.14392 | -0.05845 | 59.5769  | -0.1091  | 63.84341 | -0.17007 | 73.30992 | -0.23203 |
| 46.17726 | -0.05849 | 59.61018 | -0.10913 | 63.87675 | -0.1701  | 73.34321 | -0.23207 |
| 46.21064 | -0.05853 | 59.64351 | -0.10917 | 63.91008 | -0.17013 | 73.37649 | -0.23211 |
| 46.24398 | -0.05857 | 59.67684 | -0.10921 | 63.94336 | -0.17016 | 73.40979 | -0.23215 |
| 46.27734 | -0.0586  | 59.71018 | -0.10924 | 63.97666 | -0.17019 | 73.44307 | -0.2322  |

|          |          |          |          |          |          |          |          |
|----------|----------|----------|----------|----------|----------|----------|----------|
| 46.31072 | -0.05864 | 59.74349 | -0.10928 | 64.00997 | -0.17022 | 73.47633 | -0.23224 |
| 46.3441  | -0.05868 | 59.77682 | -0.10931 | 64.04326 | -0.17025 | 73.50961 | -0.23229 |
| 46.37749 | -0.05872 | 59.81018 | -0.10935 | 64.07654 | -0.17028 | 73.54292 | -0.23233 |
| 46.41085 | -0.05875 | 59.84348 | -0.10938 | 64.10987 | -0.1703  | 73.57625 | -0.23237 |
| 46.44423 | -0.05879 | 59.8768  | -0.10942 | 64.14316 | -0.17033 | 73.60957 | -0.23242 |
| 46.47759 | -0.05883 | 59.91011 | -0.10946 | 64.17649 | -0.17036 | 73.64287 | -0.23246 |
| 46.51089 | -0.05887 | 59.94346 | -0.10949 | 64.2098  | -0.17039 | 73.67618 | -0.23251 |
| 46.54423 | -0.0589  | 59.97677 | -0.10953 | 64.24315 | -0.17042 | 73.70952 | -0.23255 |
| 46.57754 | -0.05894 | 60.0101  | -0.10956 | 64.27649 | -0.17045 | 73.74287 | -0.2326  |
| 46.61087 | -0.05898 | 60.04338 | -0.1096  | 64.30984 | -0.17047 | 73.77621 | -0.23265 |
| 46.64418 | -0.05901 | 60.0767  | -0.10963 | 64.3432  | -0.1705  | 73.80954 | -0.23269 |
| 46.67752 | -0.05905 | 60.11007 | -0.10967 | 64.37654 | -0.17053 | 73.84284 | -0.23274 |
| 46.71089 | -0.05909 | 60.14338 | -0.1097  | 64.4099  | -0.17056 | 73.87618 | -0.23279 |
| 46.74421 | -0.05912 | 60.17672 | -0.10974 | 64.44326 | -0.17059 | 73.90949 | -0.23283 |
| 46.77752 | -0.05915 | 60.21007 | -0.10977 | 64.47661 | -0.17061 | 73.94284 | -0.23288 |
| 46.81085 | -0.05919 | 60.24344 | -0.10981 | 64.50993 | -0.17064 | 73.9762  | -0.23293 |
| 46.84418 | -0.05922 | 60.27679 | -0.10984 | 64.54328 | -0.17067 | 74.00952 | -0.23298 |
| 46.87751 | -0.05925 | 60.31013 | -0.10987 | 64.57662 | -0.1707  | 74.04284 | -0.23303 |
| 46.91082 | -0.05928 | 60.34348 | -0.10991 | 64.60997 | -0.17073 | 74.07613 | -0.23308 |
| 46.94416 | -0.05932 | 60.37685 | -0.10994 | 64.64326 | -0.17075 | 74.10944 | -0.23313 |
| 46.97749 | -0.05935 | 60.41015 | -0.10997 | 64.67659 | -0.17078 | 74.14277 | -0.23319 |
| 47.01082 | -0.05938 | 60.44348 | -0.11001 | 64.70992 | -0.17081 | 74.1761  | -0.23324 |
| 47.04413 | -0.0594  | 60.47679 | -0.11004 | 64.74326 | -0.17084 | 74.20943 | -0.23329 |
| 47.07744 | -0.05943 | 60.51011 | -0.11007 | 64.77659 | -0.17087 | 74.24275 | -0.23335 |
| 47.11075 | -0.05946 | 60.54343 | -0.1101  | 64.80993 | -0.17089 | 74.27608 | -0.2334  |
| 47.14405 | -0.05948 | 60.57677 | -0.11013 | 64.84326 | -0.17092 | 74.30939 | -0.23345 |
| 47.17734 | -0.05951 | 60.61011 | -0.11016 | 64.87661 | -0.17095 | 74.34274 | -0.23351 |
| 47.21067 | -0.05953 | 60.64343 | -0.11019 | 64.90992 | -0.17098 | 74.37607 | -0.23357 |
| 47.24397 | -0.05956 | 60.67674 | -0.11022 | 64.94325 | -0.17101 | 74.40944 | -0.23362 |
| 47.27726 | -0.05958 | 60.71003 | -0.11025 | 64.97661 | -0.17103 | 74.44279 | -0.23368 |
| 47.31057 | -0.0596  | 60.74334 | -0.11028 | 65.00997 | -0.17106 | 74.47615 | -0.23374 |
| 47.34389 | -0.05962 | 60.77667 | -0.11031 | 65.0433  | -0.17109 | 74.50951 | -0.23379 |
| 47.37721 | -0.05964 | 60.80995 | -0.11034 | 65.07664 | -0.17112 | 74.54282 | -0.23385 |
| 47.41049 | -0.05966 | 60.84325 | -0.11037 | 65.11    | -0.17115 | 74.5762  | -0.23391 |
| 47.44379 | -0.05968 | 60.87651 | -0.1104  | 65.14336 | -0.17117 | 74.60954 | -0.23397 |
| 47.47708 | -0.05969 | 60.9098  | -0.11043 | 65.17667 | -0.1712  | 74.64292 | -0.23403 |
| 47.51041 | -0.05971 | 60.94308 | -0.11046 | 65.21    | -0.17123 | 74.67626 | -0.23409 |
| 47.5437  | -0.05972 | 60.97638 | -0.11048 | 65.24334 | -0.17126 | 74.70961 | -0.23416 |
| 47.57703 | -0.05974 | 61.00967 | -0.11051 | 65.27667 | -0.17129 | 74.74297 | -0.23422 |
| 47.61034 | -0.05975 | 61.04295 | -0.11054 | 65.31003 | -0.17131 | 74.77634 | -0.23428 |
| 47.64364 | -0.05976 | 61.07625 | -0.11057 | 65.34338 | -0.17134 | 74.80972 | -0.23434 |
| 47.6769  | -0.05977 | 61.10956 | -0.11059 | 65.37674 | -0.17137 | 74.84311 | -0.23441 |
| 47.71018 | -0.05978 | 61.14285 | -0.11062 | 65.41008 | -0.1714  | 74.87649 | -0.23447 |

|          |          |          |          |          |          |          |          |
|----------|----------|----------|----------|----------|----------|----------|----------|
| 47.74348 | -0.05979 | 61.17615 | -0.11065 | 65.44344 | -0.17143 | 74.90987 | -0.23453 |
| 47.77679 | -0.0598  | 61.20946 | -0.11068 | 65.4768  | -0.17146 | 74.94325 | -0.2346  |
| 47.81008 | -0.05981 | 61.24279 | -0.1107  | 65.51015 | -0.17148 | 74.97657 | -0.23466 |
| 47.84338 | -0.05982 | 61.2761  | -0.11073 | 65.54346 | -0.17151 | 75.00995 | -0.23473 |
| 47.87667 | -0.05982 | 61.30946 | -0.11076 | 65.5768  | -0.17154 | 75.04331 | -0.2348  |
| 47.90997 | -0.05983 | 61.34277 | -0.11078 | 65.6101  | -0.17157 | 75.07669 | -0.23486 |
| 47.94325 | -0.05984 | 61.3761  | -0.11081 | 65.64341 | -0.1716  | 75.11003 | -0.23493 |
| 47.97657 | -0.05984 | 61.40944 | -0.11084 | 65.67672 | -0.17163 | 75.14341 | -0.23499 |
| 48.0099  | -0.05985 | 61.44275 | -0.11086 | 65.71003 | -0.17165 | 75.17679 | -0.23506 |
| 48.0432  | -0.05985 | 61.4761  | -0.11089 | 65.74334 | -0.17168 | 75.21013 | -0.23513 |
| 48.07651 | -0.05985 | 61.50944 | -0.11092 | 65.77666 | -0.17171 | 75.24351 | -0.23519 |
| 48.10982 | -0.05986 | 61.54279 | -0.11095 | 65.80997 | -0.17174 | 75.27687 | -0.23526 |
| 48.14316 | -0.05986 | 61.5761  | -0.11097 | 65.8433  | -0.17177 | 75.31018 | -0.23533 |
| 48.17648 | -0.05986 | 61.60943 | -0.111   | 65.87666 | -0.1718  | 75.34352 | -0.2354  |
| 48.20979 | -0.05987 | 61.64277 | -0.11103 | 65.90997 | -0.17182 | 75.37688 | -0.23546 |
| 48.2431  | -0.05987 | 61.67611 | -0.11106 | 65.94326 | -0.17185 | 75.41028 | -0.23553 |
| 48.27643 | -0.05987 | 61.70944 | -0.11109 | 65.97662 | -0.17188 | 75.44362 | -0.2356  |
| 48.30972 | -0.05987 | 61.74279 | -0.11112 | 66.00998 | -0.17191 | 75.47698 | -0.23566 |
| 48.34305 | -0.05987 | 61.77613 | -0.11114 | 66.04333 | -0.17194 | 75.51034 | -0.23573 |
| 48.37636 | -0.05988 | 61.80949 | -0.11117 | 66.07667 | -0.17197 | 75.54372 | -0.2358  |
| 48.40966 | -0.05988 | 61.84282 | -0.1112  | 66.11002 | -0.172   | 75.57705 | -0.23587 |
| 48.443   | -0.05988 | 61.8762  | -0.11123 | 66.14334 | -0.17203 | 75.61041 | -0.23593 |
| 48.47634 | -0.05988 | 61.90954 | -0.11126 | 66.17667 | -0.17205 | 75.64374 | -0.236   |
| 48.50967 | -0.05989 | 61.94289 | -0.11129 | 66.21    | -0.17208 | 75.67707 | -0.23607 |
| 48.54302 | -0.05989 | 61.97625 | -0.11132 | 66.24334 | -0.17211 | 75.71039 | -0.23613 |
| 48.57634 | -0.05989 | 62.00961 | -0.11136 | 66.27669 | -0.17214 | 75.74369 | -0.2362  |
| 48.6097  | -0.05989 | 62.04295 | -0.11139 | 66.31005 | -0.17217 | 75.777   | -0.23627 |
| 48.64307 | -0.0599  | 62.07634 | -0.11142 | 66.34341 | -0.1722  | 75.81031 | -0.23633 |
| 48.67643 | -0.0599  | 62.10972 | -0.11145 | 66.3767  | -0.17223 | 75.84366 | -0.2364  |
| 48.70975 | -0.05991 | 62.14308 | -0.11148 | 66.41003 | -0.17226 | 75.87702 | -0.23646 |
| 48.74308 | -0.05991 | 62.17646 | -0.11152 | 66.44333 | -0.17229 | 75.91034 | -0.23653 |
| 48.77644 | -0.05992 | 62.2098  | -0.11155 | 66.47666 | -0.17232 | 75.94372 | -0.23659 |
| 48.80979 | -0.05992 | 62.24315 | -0.11158 | 66.50997 | -0.17235 | 75.97707 | -0.23666 |
| 48.84316 | -0.05993 | 62.27648 | -0.11162 | 66.54331 | -0.17238 | 76.01038 | -0.23672 |
| 48.87652 | -0.05994 | 62.30982 | -0.11165 | 66.57667 | -0.17241 | 76.04372 | -0.23678 |
| 48.90989 | -0.05994 | 62.34318 | -0.11169 | 66.61    | -0.17244 | 76.07707 | -0.23685 |
| 48.94325 | -0.05995 | 62.37652 | -0.11172 | 66.64333 | -0.17247 | 76.11041 | -0.23691 |
| 48.97659 | -0.05996 | 62.40987 | -0.11176 | 66.67667 | -0.1725  | 76.14375 | -0.23697 |
| 49.00997 | -0.05997 | 62.44323 | -0.1118  | 66.71002 | -0.17253 | 76.1771  | -0.23704 |
| 49.04331 | -0.05998 | 62.47659 | -0.11183 | 66.74333 | -0.17256 | 76.21044 | -0.2371  |
| 49.07669 | -0.05999 | 62.50995 | -0.11187 | 66.77662 | -0.17259 | 76.24379 | -0.23716 |
| 49.11008 | -0.06    | 62.5433  | -0.11191 | 66.80993 | -0.17262 | 76.27713 | -0.23722 |
| 49.14344 | -0.06002 | 62.57664 | -0.11194 | 66.84325 | -0.17265 | 76.31044 | -0.23728 |

|          |          |          |          |          |          |          |          |
|----------|----------|----------|----------|----------|----------|----------|----------|
| 49.1768  | -0.06003 | 62.60995 | -0.11198 | 66.87657 | -0.17268 | 76.34379 | -0.23734 |
| 49.21016 | -0.06004 | 62.64326 | -0.11202 | 66.90992 | -0.17271 | 76.37713 | -0.2374  |
| 49.24348 | -0.06006 | 62.67661 | -0.11206 | 66.94328 | -0.17275 | 76.41049 | -0.23746 |
| 49.27685 | -0.06007 | 62.70995 | -0.1121  | 66.97662 | -0.17278 | 76.44379 | -0.23752 |
| 49.3102  | -0.06009 | 62.74331 | -0.11213 | 67.00997 | -0.17281 | 76.47713 | -0.23758 |
| 49.34356 | -0.06011 | 62.77666 | -0.11217 | 67.0433  | -0.17284 | 76.51046 | -0.23764 |
| 49.37689 | -0.06013 | 62.80998 | -0.11221 | 67.07664 | -0.17288 | 76.54379 | -0.2377  |
| 49.41021 | -0.06015 | 62.84331 | -0.11225 | 67.10998 | -0.17291 | 76.57715 | -0.23775 |
| 49.44357 | -0.06016 | 62.87666 | -0.11229 | 67.14331 | -0.17294 | 76.61048 | -0.23781 |
| 49.4769  | -0.06018 | 62.91003 | -0.11233 | 67.17661 | -0.17298 | 76.64382 | -0.23787 |
| 49.51025 | -0.06021 | 62.94338 | -0.11237 | 67.20992 | -0.17301 | 76.67713 | -0.23792 |
| 49.54357 | -0.06023 | 62.97675 | -0.11241 | 67.24326 | -0.17305 | 76.71044 | -0.23798 |
| 49.57693 | -0.06025 | 63.01008 | -0.11245 | 67.27657 | -0.17308 | 76.74379 | -0.23804 |
| 49.6103  | -0.06027 | 63.04343 | -0.11249 | 67.30992 | -0.17312 | 76.7771  | -0.23809 |
| 49.64366 | -0.0603  | 63.07675 | -0.11253 | 67.34321 | -0.17315 | 76.81043 | -0.23815 |
| 49.67702 | -0.06032 | 63.11011 | -0.11257 | 67.37657 | -0.17319 | 76.84375 | -0.2382  |
| 49.71041 | -0.06034 | 63.14348 | -0.11261 | 67.4099  | -0.17322 | 76.87708 | -0.23826 |
| 49.74382 | -0.06037 | 63.17685 | -0.11265 | 67.44323 | -0.17326 | 76.91039 | -0.23831 |
| 49.77716 | -0.0604  | 63.21021 | -0.11269 | 67.47657 | -0.1733  | 76.94372 | -0.23837 |
| 49.81051 | -0.06042 | 63.24361 | -0.11273 | 67.50992 | -0.17333 | 76.97705 | -0.23842 |
| 49.84385 | -0.06045 | 63.27698 | -0.11277 | 67.54328 | -0.17337 | 77.01039 | -0.23847 |
| 49.87721 | -0.06048 | 63.31034 | -0.11281 | 67.57664 | -0.17341 | 77.04369 | -0.23853 |
| 49.91056 | -0.0605  | 63.34367 | -0.11286 | 67.60995 | -0.17345 | 77.07697 | -0.23858 |
| 49.94392 | -0.06053 | 63.37703 | -0.1129  | 67.64333 | -0.17349 | 77.11025 | -0.23863 |
| 49.97725 | -0.06056 | 63.41039 | -0.11294 | 67.67669 | -0.17353 | 77.14359 | -0.23869 |
| 50.01059 | -0.06059 | 63.44375 | -0.11298 | 67.71005 | -0.17357 | 77.17692 | -0.23874 |
| 50.04392 | -0.06061 | 63.47713 | -0.11302 | 67.74339 | -0.17361 | 77.21023 | -0.23879 |
| 50.07726 | -0.06064 | 63.51044 | -0.11306 | 67.77677 | -0.17365 | 77.24356 | -0.23884 |
| 50.11061 | -0.06067 | 63.54379 | -0.11309 | 67.81011 | -0.17369 | 77.27689 | -0.23889 |
| 50.14397 | -0.0607  | 63.57711 | -0.11313 | 67.84348 | -0.17373 | 77.31021 | -0.23895 |
| 50.17729 | -0.06073 | 63.61046 | -0.11317 | 67.87682 | -0.17377 | 77.34357 | -0.239   |
| 50.21064 | -0.06076 | 63.6438  | -0.11321 | 67.91016 | -0.17381 | 77.37692 | -0.23905 |
| 50.24397 | -0.06079 | 63.67715 | -0.11325 | 67.94354 | -0.17385 | 77.41023 | -0.2391  |
| 50.2773  | -0.06082 | 63.71048 | -0.11329 | 67.97693 | -0.1739  | 77.44352 | -0.23915 |
| 50.31062 | -0.06085 | 63.74382 | -0.11333 | 68.01028 | -0.17394 | 77.47685 | -0.2392  |
| 50.34397 | -0.06087 | 63.77711 | -0.11337 | 68.04361 | -0.17398 | 77.51016 | -0.23925 |
| 50.37728 | -0.0609  | 63.81046 | -0.11341 | 68.07692 | -0.17403 | 77.54349 | -0.2393  |
| 50.41064 | -0.06093 | 63.84375 | -0.11344 | 68.11026 | -0.17407 | 77.5768  | -0.23935 |
| 50.44397 | -0.06096 | 63.8771  | -0.11348 | 68.14361 | -0.17412 | 77.61011 | -0.2394  |
| 50.47728 | -0.06099 | 63.91043 | -0.11352 | 68.17697 | -0.17416 | 77.64343 | -0.23946 |
| 50.51057 | -0.06101 | 63.94375 | -0.11356 | 68.21031 | -0.17421 | 77.67675 | -0.23951 |
| 50.54389 | -0.06104 | 63.97708 | -0.11359 | 68.24366 | -0.17425 | 77.71008 | -0.23956 |
| 50.57721 | -0.06107 | 64.01038 | -0.11363 | 68.27698 | -0.1743  | 77.74344 | -0.23961 |

|          |          |          |          |          |          |          |          |
|----------|----------|----------|----------|----------|----------|----------|----------|
| 50.61054 | -0.0611  | 64.04371 | -0.11367 | 68.3103  | -0.17434 | 77.7768  | -0.23966 |
| 50.64384 | -0.06112 | 64.07702 | -0.1137  | 68.34359 | -0.17439 | 77.81015 | -0.23971 |
| 50.67715 | -0.06115 | 64.11034 | -0.11374 | 68.37687 | -0.17443 | 77.84349 | -0.23976 |
| 50.71049 | -0.06117 | 64.14366 | -0.11378 | 68.4102  | -0.17448 | 77.8768  | -0.23981 |
| 50.74385 | -0.0612  | 64.17693 | -0.11381 | 68.44352 | -0.17453 | 77.91013 | -0.23986 |
| 50.77721 | -0.06122 | 64.21025 | -0.11385 | 68.47687 | -0.17457 | 77.94346 | -0.23991 |
| 50.81052 | -0.06124 | 64.24356 | -0.11388 | 68.5102  | -0.17462 | 77.97675 | -0.23996 |
| 50.84385 | -0.06127 | 64.27687 | -0.11392 | 68.54354 | -0.17467 | 78.01005 | -0.24001 |
| 50.87715 | -0.06129 | 64.31018 | -0.11395 | 68.5769  | -0.17471 | 78.04336 | -0.24006 |
| 50.91046 | -0.06131 | 64.34351 | -0.11399 | 68.61023 | -0.17476 | 78.07667 | -0.24012 |
| 50.94377 | -0.06133 | 64.37684 | -0.11402 | 68.64359 | -0.17481 | 78.11    | -0.24017 |
| 50.97708 | -0.06136 | 64.41016 | -0.11406 | 68.67695 | -0.17486 | 78.14331 | -0.24022 |
| 51.01039 | -0.06138 | 64.44348 | -0.11409 | 68.7103  | -0.1749  | 78.17661 | -0.24027 |
| 51.04367 | -0.0614  | 64.47679 | -0.11412 | 68.74366 | -0.17495 | 78.20995 | -0.24032 |
| 51.07697 | -0.06142 | 64.5101  | -0.11416 | 68.777   | -0.175   | 78.2433  | -0.24037 |
| 51.11026 | -0.06144 | 64.54341 | -0.11419 | 68.81039 | -0.17504 | 78.27661 | -0.24043 |
| 51.14354 | -0.06145 | 64.57675 | -0.11423 | 68.84375 | -0.17509 | 78.30993 | -0.24048 |
| 51.17684 | -0.06147 | 64.61011 | -0.11426 | 68.8771  | -0.17514 | 78.34328 | -0.24053 |
| 51.21013 | -0.06149 | 64.64344 | -0.11429 | 68.91043 | -0.17518 | 78.37659 | -0.24058 |
| 51.24343 | -0.06151 | 64.67679 | -0.11433 | 68.94375 | -0.17523 | 78.4099  | -0.24064 |
| 51.27674 | -0.06152 | 64.71011 | -0.11436 | 68.97707 | -0.17528 | 78.4432  | -0.24069 |
| 51.31003 | -0.06154 | 64.74344 | -0.11439 | 69.01038 | -0.17532 | 78.47651 | -0.24074 |
| 51.34333 | -0.06156 | 64.77677 | -0.11443 | 69.04369 | -0.17537 | 78.50979 | -0.24079 |
| 51.37662 | -0.06157 | 64.81008 | -0.11446 | 69.07698 | -0.17541 | 78.54313 | -0.24085 |
| 51.40993 | -0.06159 | 64.84339 | -0.11449 | 69.11031 | -0.17546 | 78.57644 | -0.2409  |
| 51.44326 | -0.0616  | 64.87674 | -0.11453 | 69.14362 | -0.1755  | 78.60975 | -0.24096 |
| 51.47657 | -0.06162 | 64.9101  | -0.11456 | 69.17693 | -0.17555 | 78.64307 | -0.24101 |
| 51.50993 | -0.06163 | 64.94341 | -0.11459 | 69.21026 | -0.17559 | 78.67639 | -0.24106 |
| 51.54325 | -0.06165 | 64.97675 | -0.11463 | 69.24357 | -0.17564 | 78.70972 | -0.24112 |
| 51.57656 | -0.06166 | 65.01005 | -0.11466 | 69.27689 | -0.17568 | 78.74308 | -0.24117 |
| 51.60989 | -0.06167 | 65.04341 | -0.11469 | 69.31023 | -0.17572 | 78.77641 | -0.24123 |
| 51.64318 | -0.06169 | 65.07674 | -0.11472 | 69.34354 | -0.17577 | 78.80977 | -0.24129 |
| 51.67649 | -0.0617  | 65.1101  | -0.11476 | 69.37687 | -0.17581 | 78.8431  | -0.24134 |
| 51.70982 | -0.06172 | 65.14343 | -0.11479 | 69.41015 | -0.17585 | 78.87641 | -0.2414  |
| 51.74311 | -0.06173 | 65.17674 | -0.11482 | 69.44344 | -0.17589 | 78.90972 | -0.24145 |
| 51.77643 | -0.06174 | 65.21005 | -0.11486 | 69.47677 | -0.17593 | 78.94305 | -0.24151 |
| 51.80977 | -0.06176 | 65.24338 | -0.11489 | 69.51008 | -0.17597 | 78.97634 | -0.24157 |
| 51.84311 | -0.06177 | 65.27664 | -0.11492 | 69.54339 | -0.17601 | 79.00964 | -0.24163 |
| 51.87648 | -0.06178 | 65.30995 | -0.11496 | 69.57669 | -0.17605 | 79.04295 | -0.24168 |
| 51.90982 | -0.0618  | 65.34326 | -0.11499 | 69.61002 | -0.17609 | 79.07626 | -0.24174 |
| 51.94316 | -0.06181 | 65.37656 | -0.11503 | 69.64336 | -0.17613 | 79.10959 | -0.2418  |
| 51.97649 | -0.06183 | 65.40987 | -0.11506 | 69.67666 | -0.17617 | 79.14295 | -0.24186 |
| 52.00984 | -0.06184 | 65.44316 | -0.11509 | 69.70995 | -0.17621 | 79.17628 | -0.24192 |



|          |          |          |          |          |          |          |          |
|----------|----------|----------|----------|----------|----------|----------|----------|
| 52.04316 | -0.06185 | 65.47646 | -0.11513 | 69.74323 | -0.17624 | 79.20966 | -0.24198 |
| 52.07652 | -0.06187 | 65.50977 | -0.11516 | 69.77652 | -0.17628 | 79.24302 | -0.24204 |
| 52.10987 | -0.06188 | 65.54313 | -0.1152  | 69.8098  | -0.17632 | 79.27638 | -0.2421  |
| 52.14321 | -0.0619  | 65.57644 | -0.11523 | 69.84311 | -0.17635 | 79.3097  | -0.24216 |
| 52.17657 | -0.06192 | 65.60977 | -0.11527 | 69.87643 | -0.17639 | 79.34303 | -0.24222 |
| 52.2099  | -0.06193 | 65.64311 | -0.1153  | 69.90972 | -0.17642 | 79.37639 | -0.24228 |
| 52.24325 | -0.06195 | 65.67646 | -0.11534 | 69.94298 | -0.17645 | 79.40975 | -0.24234 |
| 52.27659 | -0.06196 | 65.70979 | -0.11537 | 69.97626 | -0.17649 | 79.4431  | -0.2424  |
| 52.30993 | -0.06198 | 65.74313 | -0.11541 | 70.00952 | -0.17652 | 79.47646 | -0.24246 |
| 52.34328 | -0.062   | 65.77644 | -0.11544 | 70.04282 | -0.17655 | 79.50984 | -0.24252 |
| 52.37662 | -0.06202 | 65.8098  | -0.11548 | 70.07613 | -0.17659 | 79.54321 | -0.24259 |
| 52.40993 | -0.06204 | 65.84313 | -0.11552 | 70.10949 | -0.17662 | 79.57661 | -0.24265 |
| 52.44325 | -0.06205 | 65.87649 | -0.11555 | 70.1428  | -0.17665 | 79.60997 | -0.24271 |
| 52.47657 | -0.06207 | 65.9098  | -0.11559 | 70.17611 | -0.17668 | 79.64336 | -0.24277 |
| 52.5099  | -0.06209 | 65.94313 | -0.11563 | 70.20941 | -0.17671 | 79.67672 | -0.24284 |
| 52.54323 | -0.06211 | 65.97648 | -0.11566 | 70.24275 | -0.17674 | 79.71008 | -0.2429  |
| 52.57657 | -0.06213 | 66.00982 | -0.1157  | 70.27608 | -0.17677 | 79.74344 | -0.24296 |
| 52.60992 | -0.06216 | 66.04316 | -0.11574 | 70.30941 | -0.1768  | 79.77677 | -0.24303 |
| 52.64325 | -0.06218 | 66.07649 | -0.11577 | 70.34272 | -0.17683 | 79.8101  | -0.24309 |
| 52.67659 | -0.0622  | 66.10987 | -0.11581 | 70.37605 | -0.17686 | 79.84343 | -0.24315 |
| 52.7099  | -0.06222 | 66.14316 | -0.11585 | 70.40938 | -0.17689 | 79.87675 | -0.24322 |
| 52.7432  | -0.06225 | 66.17651 | -0.11589 | 70.44267 | -0.17692 | 79.9101  | -0.24328 |
| 52.77648 | -0.06227 | 66.20989 | -0.11593 | 70.47598 | -0.17695 | 79.94344 | -0.24335 |
| 52.80979 | -0.06229 | 66.24321 | -0.11597 | 70.50931 | -0.17697 | 79.97677 | -0.24341 |
| 52.84313 | -0.06232 | 66.27656 | -0.116   | 70.54264 | -0.177   | 80.01011 | -0.24347 |
| 52.87649 | -0.06234 | 66.30987 | -0.11604 | 70.57598 | -0.17703 | 80.04348 | -0.24354 |
| 52.90984 | -0.06237 | 66.3432  | -0.11608 | 70.60929 | -0.17706 | 80.07684 | -0.2436  |
| 52.94321 | -0.06239 | 66.37652 | -0.11612 | 70.64262 | -0.17709 | 80.1102  | -0.24367 |
| 52.97656 | -0.06242 | 66.40987 | -0.11616 | 70.67593 | -0.17711 | 80.14352 | -0.24373 |
| 53.00992 | -0.06244 | 66.44318 | -0.1162  | 70.70926 | -0.17714 | 80.1769  | -0.24379 |
| 53.04328 | -0.06247 | 66.47652 | -0.11624 | 70.74261 | -0.17717 | 80.21026 | -0.24386 |
| 53.07666 | -0.0625  | 66.50987 | -0.11628 | 70.77592 | -0.1772  | 80.24361 | -0.24392 |
| 53.11003 | -0.06252 | 66.54321 | -0.11632 | 70.80926 | -0.17723 | 80.27692 | -0.24398 |
| 53.14341 | -0.06255 | 66.57657 | -0.11636 | 70.84256 | -0.17726 | 80.31028 | -0.24405 |
| 53.17679 | -0.06258 | 66.60989 | -0.1164  | 70.87589 | -0.17728 | 80.34362 | -0.24411 |
| 53.21013 | -0.0626  | 66.64323 | -0.11644 | 70.9092  | -0.17731 | 80.37697 | -0.24417 |
| 53.24349 | -0.06263 | 66.67659 | -0.11648 | 70.94252 | -0.17734 | 80.41033 | -0.24423 |
| 53.27685 | -0.06266 | 66.70992 | -0.11652 | 70.97585 | -0.17737 | 80.44369 | -0.2443  |
| 53.31021 | -0.06268 | 66.74323 | -0.11656 | 71.00921 | -0.1774  | 80.47707 | -0.24436 |
| 53.34357 | -0.06271 | 66.77656 | -0.1166  | 71.04257 | -0.17743 | 80.51039 | -0.24442 |
| 53.37693 | -0.06274 | 66.80987 | -0.11664 | 71.0759  | -0.17746 | 80.54375 | -0.24448 |
| 53.41026 | -0.06277 | 66.84321 | -0.11668 | 71.10928 | -0.17749 | 80.57707 | -0.24454 |
| 53.44361 | -0.06279 | 66.87656 | -0.11672 | 71.14264 | -0.17752 | 80.61039 | -0.2446  |

|          |          |          |          |          |          |          |          |
|----------|----------|----------|----------|----------|----------|----------|----------|
| 53.47692 | -0.06282 | 66.90989 | -0.11676 | 71.17598 | -0.17755 | 80.64372 | -0.24466 |
| 53.51028 | -0.06285 | 66.9432  | -0.1168  | 71.20934 | -0.17758 | 80.67705 | -0.24471 |
| 53.54357 | -0.06287 | 66.97652 | -0.11684 | 71.24272 | -0.17762 | 80.71038 | -0.24477 |
| 53.57692 | -0.0629  | 67.00984 | -0.11688 | 71.2761  | -0.17765 | 80.74372 | -0.24483 |
| 53.61025 | -0.06292 | 67.0432  | -0.11691 | 71.30948 | -0.17768 | 80.77707 | -0.24489 |
| 53.64354 | -0.06295 | 67.07652 | -0.11695 | 71.34282 | -0.17771 | 80.81041 | -0.24494 |
| 53.67689 | -0.06297 | 67.10985 | -0.11699 | 71.3762  | -0.17775 | 80.84374 | -0.245   |
| 53.71021 | -0.063   | 67.1432  | -0.11703 | 71.40956 | -0.17778 | 80.87708 | -0.24505 |
| 53.74351 | -0.06302 | 67.17652 | -0.11707 | 71.44295 | -0.17782 | 80.91041 | -0.24511 |
| 53.77684 | -0.06305 | 67.20987 | -0.11711 | 71.47633 | -0.17785 | 80.94372 | -0.24516 |
| 53.81015 | -0.06307 | 67.24321 | -0.11715 | 71.5097  | -0.17789 | ...      | ...      |
| 53.84344 | -0.06309 | 67.27656 | -0.11718 | 71.54305 | -0.17793 |          |          |
| 53.87675 | -0.06311 | 67.30992 | -0.11722 | 71.57639 | -0.17796 |          |          |
| 53.91007 | -0.06314 | 67.34325 | -0.11726 | 71.60975 | -0.178   |          |          |
| 53.94336 | -0.06316 | 67.37659 | -0.1173  | 71.6431  | -0.17804 |          |          |
| 53.97667 | -0.06318 | 67.40997 | -0.11733 | 71.67644 | -0.17808 |          |          |
| 54.00998 | -0.0632  | 67.44331 | -0.11737 | 71.70979 | -0.17812 |          |          |
| 54.0433  | -0.06322 | 67.47666 | -0.11741 | 71.74316 | -0.17816 |          |          |
| 54.07661 | -0.06324 | 67.50998 | -0.11744 | 71.77657 | -0.1782  |          |          |
| 54.1099  | -0.06325 | 67.54334 | -0.11748 | 71.80995 | -0.17824 |          |          |
| 54.14321 | -0.06327 | 67.57666 | -0.11752 | 71.84331 | -0.17828 |          |          |
| 54.17652 | -0.06329 | 67.60998 | -0.11755 | 71.87666 | -0.17832 |          |          |
| 54.20982 | -0.06331 | 67.64333 | -0.11759 | 71.90998 | -0.17836 |          |          |
| 54.24315 | -0.06332 | 67.67666 | -0.11762 | 71.94333 | -0.17841 |          |          |
| 54.27644 | -0.06334 | 67.70998 | -0.11765 | 71.97674 | -0.17845 |          |          |
| 54.30975 | -0.06335 | 67.74333 | -0.11769 | 72.01011 | -0.17849 |          |          |
| 54.34307 | -0.06337 | 67.77666 | -0.11772 | 72.04352 | -0.17854 |          |          |
| 54.37638 | -0.06338 | 67.81    | -0.11776 | 72.07692 | -0.17858 |          |          |
| 54.40971 | -0.06339 | 67.84331 | -0.11779 | 72.11028 | -0.17863 |          |          |
| 54.44308 | -0.06341 | 67.87666 | -0.11782 | 72.14362 | -0.17867 |          |          |
| 54.47643 | -0.06342 | 67.91    | -0.11785 | 72.177   | -0.17872 |          |          |
| 54.50977 | -0.06343 | 67.94338 | -0.11789 | 72.21034 | -0.17876 |          |          |
| 54.5431  | -0.06344 | 67.97672 | -0.11792 | 72.2437  | -0.17881 |          |          |
| 54.57646 | -0.06345 | 68.01007 | -0.11795 | 72.27708 | -0.17885 |          |          |
| 54.6098  | -0.06346 | 68.04339 | -0.11798 | 72.31041 | -0.1789  |          |          |
| 54.64313 | -0.06347 | 68.07675 | -0.11801 | 72.34377 | -0.17894 |          |          |
| 54.67649 | -0.06348 | 68.11008 | -0.11804 | 72.37711 | -0.17899 |          |          |
| 54.70985 | -0.06349 | 68.14339 | -0.11807 | 72.41046 | -0.17903 |          |          |
| 54.74321 | -0.0635  | 68.17677 | -0.1181  | 72.44384 | -0.17908 |          |          |
| 54.77657 | -0.06351 | 68.21011 | -0.11813 | 72.4772  | -0.17912 |          |          |
| 54.80993 | -0.06351 | 68.24343 | -0.11816 | 72.51052 | -0.17917 |          |          |
| 54.84325 | -0.06352 | 68.27675 | -0.11819 | 72.54387 | -0.17921 |          |          |
| 54.87659 | -0.06353 | 68.31008 | -0.11822 | 72.57721 | -0.17926 |          |          |

|          |          |          |          |          |          |
|----------|----------|----------|----------|----------|----------|
| 54.90992 | -0.06354 | 68.34344 | -0.11824 | 72.61054 | -0.1793  |
| 54.94326 | -0.06354 | 68.37677 | -0.11827 | 72.6439  | -0.17935 |
| 54.97657 | -0.06355 | 68.4101  | -0.1183  | 72.67725 | -0.17939 |
| 55.0099  | -0.06355 | 68.44341 | -0.11833 | 72.71057 | -0.17944 |
| 55.0432  | -0.06356 | 68.47677 | -0.11835 | 72.74392 | -0.17948 |
| 55.07651 | -0.06357 | 68.5101  | -0.11838 | 72.77723 | -0.17952 |
| 55.10982 | -0.06357 | 68.54343 | -0.11841 | 72.81056 | -0.17957 |
| 55.14315 | -0.06358 | 68.57675 | -0.11843 | 72.84389 | -0.17961 |
| 55.17648 | -0.06359 | 68.61007 | -0.11846 | 72.87725 | -0.17965 |
| 55.2098  | -0.06359 | ...      | ...      | 72.91059 | -0.17969 |
| 55.24315 | -0.0636  |          |          | 72.94397 | -0.17973 |
| 55.27649 | -0.0636  |          |          | 72.97731 | -0.17977 |
| 55.30982 | -0.06361 |          |          | 73.01064 | -0.17981 |
| 55.34316 | -0.06362 |          |          | 73.04397 | -0.17985 |
| 55.37651 | -0.06362 |          |          | 73.07728 | -0.17989 |
| 55.40985 | -0.06363 |          |          | 73.11062 | -0.17993 |
| 55.44321 | -0.06363 |          |          | 73.14393 | -0.17997 |
| 55.47654 | -0.06364 |          |          | 73.17726 | -0.18    |
| 55.5099  | -0.06365 |          |          | 73.21057 | -0.18004 |
| 55.54323 | -0.06365 |          |          | 73.2439  | -0.18008 |
| 55.57661 | -0.06366 |          |          | 73.27718 | -0.18011 |
| 55.60998 | -0.06367 |          |          | 73.31051 | -0.18015 |
| 55.64334 | -0.06368 |          |          | 73.34382 | -0.18018 |
| 55.6767  | -0.06368 |          |          | 73.37715 | -0.18021 |
| 55.71005 | -0.06369 |          |          | 73.41044 | -0.18025 |
| 55.74338 | -0.0637  |          |          | 73.44375 | -0.18028 |
| 55.77672 | -0.06371 |          |          | 73.47705 | -0.18031 |
| 55.81007 | -0.06371 |          |          | 73.51033 | -0.18034 |
| ...      | ...      |          |          | 73.54361 | -0.18037 |
|          |          |          |          | 73.57692 | -0.1804  |
|          |          |          |          | 73.61023 | -0.18043 |
|          |          |          |          | 73.64354 | -0.18046 |
|          |          |          |          | 73.67685 | -0.18048 |
|          |          |          |          | 73.71016 | -0.18051 |
|          |          |          |          | 73.74348 | -0.18054 |
|          |          |          |          | 73.77677 | -0.18056 |
|          |          |          |          | 73.81005 | -0.18059 |
|          |          |          |          | 73.84338 | -0.18061 |
|          |          |          |          | 73.8767  | -0.18064 |
|          |          |          |          | 73.91007 | -0.18066 |
|          |          |          |          | 73.94341 | -0.18068 |
|          |          |          |          | 73.97677 | -0.1807  |
|          |          |          |          | 74.01008 | -0.18073 |

|          |          |
|----------|----------|
| 74.04343 | -0.18075 |
| 74.07672 | -0.18077 |
| 74.11002 | -0.18079 |
| 74.14334 | -0.18081 |
| 74.17666 | -0.18083 |
| 74.20997 | -0.18084 |
| 74.24331 | -0.18086 |
| 74.27662 | -0.18088 |
| 74.30995 | -0.1809  |
| 74.34331 | -0.18091 |
| 74.37666 | -0.18093 |
| 74.41002 | -0.18095 |
| 74.44336 | -0.18096 |
| 74.47667 | -0.18098 |
| 74.51    | -0.18099 |
| 74.54336 | -0.18101 |
| 74.57669 | -0.18102 |
| 74.61002 | -0.18104 |
| 74.64336 | -0.18105 |
| 74.67666 | -0.18106 |
| 74.70997 | -0.18108 |
| 74.74331 | -0.18109 |
| 74.77664 | -0.1811  |
| 74.80998 | -0.18112 |
| 74.84331 | -0.18113 |
| 74.87662 | -0.18114 |
| 74.90993 | -0.18115 |
| 74.94325 | -0.18116 |
| 74.97654 | -0.18117 |
| 75.00985 | -0.18119 |
| 75.04316 | -0.1812  |
| 75.07648 | -0.18121 |
| 75.1098  | -0.18122 |
| 75.14311 | -0.18123 |
| 75.17643 | -0.18124 |
| 75.20972 | -0.18125 |
| 75.24307 | -0.18126 |
| 75.27639 | -0.18127 |
| 75.30974 | -0.18128 |
| 75.34305 | -0.18129 |
| 75.37634 | -0.1813  |
| 75.40964 | -0.18131 |
| 75.44297 | -0.18132 |

|             |          |             |          |             |               |
|-------------|----------|-------------|----------|-------------|---------------|
|             |          |             |          | 75.47633    | -0.18133      |
|             |          |             |          | 75.50967    | -0.18134      |
|             |          |             |          | 75.54305    | -0.18135      |
|             |          |             |          | 75.57641    | -0.18136      |
|             |          |             |          | 75.60977    | -0.18137      |
|             |          |             |          | 75.64313    | -0.18138      |
|             |          |             |          | 75.67646    | -0.18138      |
|             |          |             |          | 75.7098     | -0.18139      |
|             |          |             | ...      | ...         |               |
| Temperature | 60 min   | Temperature | 90 min   | Temperature | Spherical PIL |
| ...         | ...      | ...         | ...      | ...         | ...           |
| 75.64303    | -0.3144  | 78.04388    | -0.39069 | 75.47662    | 0.00454       |
| 75.67638    | -0.31442 | 78.07721    | -0.39073 | 75.50993    | 0.0045        |
| 75.7097     | -0.31444 | 78.11052    | -0.39078 | 75.54325    | 0.00446       |
| 75.74302    | -0.31446 | 78.14385    | -0.39082 | 75.57657    | 0.00443       |
| 75.77631    | -0.31448 | 78.1772     | -0.39086 | 75.6099     | 0.00439       |
| 75.80962    | -0.3145  | 78.21049    | -0.39091 | 75.6432     | 0.00436       |
| 75.84297    | -0.31452 | 78.2438     | -0.39095 | 75.67654    | 0.00432       |
| 75.87626    | -0.31454 | 78.27713    | -0.391   | 75.70987    | 0.00429       |
| 75.90959    | -0.31456 | 78.31046    | -0.39104 | 75.74316    | 0.00426       |
| 75.94292    | -0.31459 | 78.34375    | -0.39109 | 75.77644    | 0.00423       |
| 75.97621    | -0.31461 | 78.37707    | -0.39113 | 75.80975    | 0.00421       |
| 76.00956    | -0.31463 | 78.41036    | -0.39117 | 75.84305    | 0.00418       |
| 76.04285    | -0.31465 | 78.44367    | -0.39122 | 75.87636    | 0.00416       |
| 76.07615    | -0.31467 | 78.47702    | -0.39126 | 75.90967    | 0.00413       |
| 76.10947    | -0.31469 | 78.51034    | -0.3913  | 75.94298    | 0.00411       |
| 76.14284    | -0.31472 | 78.54367    | -0.39134 | 75.97629    | 0.00409       |
| 76.1762     | -0.31474 | 78.57703    | -0.39139 | 76.00961    | 0.00407       |
| 76.20956    | -0.31476 | 78.61038    | -0.39143 | 76.04293    | 0.00405       |
| 76.2429     | -0.31479 | 78.64372    | -0.39147 | 76.07625    | 0.00404       |
| 76.27628    | -0.31481 | 78.67705    | -0.39151 | 76.10954    | 0.00402       |
| 76.30964    | -0.31484 | 78.71039    | -0.39156 | 76.14287    | 0.00401       |
| 76.34302    | -0.31486 | 78.74369    | -0.3916  | 76.17618    | 0.00399       |
| 76.37634    | -0.31489 | 78.777      | -0.39164 | 76.20948    | 0.00398       |
| 76.40972    | -0.31492 | 78.81033    | -0.39168 | 76.2428     | 0.00397       |
| 76.4431     | -0.31494 | 78.84364    | -0.39172 | 76.2761     | 0.00395       |
| 76.47646    | -0.31497 | 78.87698    | -0.39176 | 76.30946    | 0.00394       |
| 76.5098     | -0.315   | 78.91034    | -0.39181 | 76.3428     | 0.00393       |
| 76.54316    | -0.31503 | 78.94369    | -0.39185 | 76.37615    | 0.00392       |
| 76.57652    | -0.31506 | 78.977      | -0.39189 | 76.40944    | 0.00391       |
| 76.60985    | -0.31509 | 79.0103     | -0.39193 | 76.44277    | 0.0039        |
| 76.64323    | -0.31512 | 79.04362    | -0.39197 | 76.4761     | 0.00389       |
| 76.67657    | -0.31516 | 79.07695    | -0.39201 | 76.50941    | 0.00388       |

|          |          |          |          |          |         |
|----------|----------|----------|----------|----------|---------|
| 76.70993 | -0.31519 | 79.11026 | -0.39205 | 76.54275 | 0.00387 |
| 76.74331 | -0.31523 | 79.14357 | -0.39209 | 76.5761  | 0.00385 |
| 76.77667 | -0.31526 | 79.1769  | -0.39214 | 76.60946 | 0.00384 |
| 76.81005 | -0.3153  | 79.21023 | -0.39218 | 76.64275 | 0.00383 |
| 76.84338 | -0.31533 | 79.24356 | -0.39222 | 76.67608 | 0.00382 |
| 76.87674 | -0.31537 | 79.27689 | -0.39226 | 76.70939 | 0.0038  |
| 76.91003 | -0.31541 | 79.31023 | -0.3923  | 76.74277 | 0.00379 |
| 76.94339 | -0.31545 | 79.34356 | -0.39234 | 76.77613 | 0.00377 |
| 76.97672 | -0.31549 | 79.37689 | -0.39238 | 76.80946 | 0.00375 |
| 77.01011 | -0.31553 | 79.41021 | -0.39242 | 76.84279 | 0.00373 |
| 77.04349 | -0.31557 | 79.44351 | -0.39246 | 76.87613 | 0.00371 |
| 77.07685 | -0.31561 | 79.47687 | -0.3925  | 76.90946 | 0.00369 |
| 77.11021 | -0.31565 | 79.51018 | -0.39254 | 76.9428  | 0.00367 |
| 77.14359 | -0.3157  | 79.54351 | -0.39259 | 76.97613 | 0.00364 |
| 77.17697 | -0.31574 | 79.57682 | -0.39263 | 77.00949 | 0.00362 |
| 77.21031 | -0.31578 | 79.61016 | -0.39267 | 77.04284 | 0.00359 |
| 77.24367 | -0.31583 | 79.64349 | -0.39271 | 77.07616 | 0.00356 |
| 77.277   | -0.31588 | 79.67679 | -0.39275 | 77.10952 | 0.00353 |
| 77.31033 | -0.31592 | 79.71008 | -0.39279 | 77.1429  | 0.0035  |
| 77.34366 | -0.31597 | 79.74341 | -0.39283 | 77.17628 | 0.00346 |
| 77.377   | -0.31601 | 79.77672 | -0.39287 | 77.20962 | 0.00342 |
| 77.41033 | -0.31606 | 79.81003 | -0.39292 | 77.24302 | 0.00339 |
| 77.44367 | -0.31611 | 79.84334 | -0.39296 | 77.27639 | 0.00335 |
| 77.47698 | -0.31616 | 79.87662 | -0.393   | 77.30975 | 0.00331 |
| 77.51029 | -0.3162  | 79.90992 | -0.39304 | 77.34311 | 0.00326 |
| 77.54362 | -0.31625 | 79.94321 | -0.39308 | 77.37646 | 0.00322 |
| 77.57693 | -0.3163  | 79.97656 | -0.39312 | 77.40982 | 0.00317 |
| 77.61028 | -0.31635 | 80.00989 | -0.39317 | 77.44318 | 0.00313 |
| 77.64357 | -0.3164  | 80.04318 | -0.39321 | 77.47654 | 0.00308 |
| 77.67692 | -0.31645 | 80.07649 | -0.39325 | 77.50992 | 0.00303 |
| 77.71026 | -0.3165  | 80.10979 | -0.39329 | 77.54328 | 0.00298 |
| 77.74361 | -0.31655 | 80.1431  | -0.39334 | 77.57664 | 0.00293 |
| 77.77695 | -0.3166  | 80.17644 | -0.39338 | 77.61    | 0.00288 |
| 77.81034 | -0.31664 | 80.20977 | -0.39342 | 77.64334 | 0.00283 |
| 77.84369 | -0.31669 | 80.24313 | -0.39347 | 77.67672 | 0.00277 |
| 77.87703 | -0.31674 | 80.27648 | -0.39351 | 77.71003 | 0.00272 |
| 77.91041 | -0.31679 | 80.30984 | -0.39355 | 77.74338 | 0.00267 |
| 77.94377 | -0.31684 | 80.34318 | -0.3936  | 77.77675 | 0.00261 |
| 77.97711 | -0.31689 | 80.37652 | -0.39364 | 77.81011 | 0.00256 |
| 78.01049 | -0.31694 | 80.40989 | -0.39369 | 77.84343 | 0.0025  |
| 78.04382 | -0.31698 | 80.44325 | -0.39373 | 77.87675 | 0.00245 |
| 78.0772  | -0.31703 | 80.47659 | -0.39377 | 77.91007 | 0.0024  |
| 78.11052 | -0.31708 | 80.50993 | -0.39382 | 77.94338 | 0.00234 |

|          |          |          |          |          |         |
|----------|----------|----------|----------|----------|---------|
| 78.14385 | -0.31713 | 80.54325 | -0.39386 | 77.9767  | 0.00229 |
| 78.17716 | -0.31717 | 80.57661 | -0.39391 | 78.01003 | 0.00224 |
| 78.21046 | -0.31722 | 80.60992 | -0.39396 | 78.04338 | 0.00219 |
| 78.24377 | -0.31726 | 80.64326 | -0.394   | 78.0767  | 0.00213 |
| 78.2771  | -0.31731 | 80.67659 | -0.39405 | 78.11003 | 0.00208 |
| 78.31041 | -0.31736 | 80.70993 | -0.39409 | 78.14338 | 0.00204 |
| 78.34374 | -0.3174  | 80.7433  | -0.39414 | 78.17674 | 0.00199 |
| 78.37703 | -0.31744 | 80.77666 | -0.39419 | 78.2101  | 0.00194 |
| 78.41033 | -0.31749 | 80.81003 | -0.39424 | 78.24343 | 0.0019  |
| 78.44361 | -0.31753 | 80.84339 | -0.39428 | 78.27674 | 0.00185 |
| 78.4769  | -0.31758 | 80.87674 | -0.39433 | 78.31007 | 0.00181 |
| 78.51018 | -0.31762 | 80.91007 | -0.39438 | 78.34334 | 0.00177 |
| 78.54351 | -0.31766 | 80.94336 | -0.39443 | 78.37664 | 0.00173 |
| 78.5768  | -0.3177  | 80.97669 | -0.39448 | 78.40992 | 0.00169 |
| 78.61007 | -0.31774 | 81.01003 | -0.39453 | 78.44325 | 0.00165 |
| 78.64338 | -0.31778 | 81.04338 | -0.39458 | 78.47654 | 0.00162 |
| 78.67667 | -0.31783 | 81.07674 | -0.39462 | 78.50987 | 0.00158 |
| 78.71    | -0.31787 | 81.11005 | -0.39467 | 78.54318 | 0.00155 |
| 78.74334 | -0.31791 | 81.14338 | -0.39473 | 78.57651 | 0.00152 |
| 78.77666 | -0.31795 | 81.17671 | -0.39478 | 78.60985 | 0.00149 |
| 78.80998 | -0.31798 | 81.21005 | -0.39483 | 78.6432  | 0.00147 |
| 78.84328 | -0.31802 | 81.24336 | -0.39488 | 78.67656 | 0.00144 |
| 78.87659 | -0.31806 | 81.27669 | -0.39493 | 78.70989 | 0.00141 |
| 78.90992 | -0.3181  | 81.31    | -0.39498 | 78.74321 | 0.00139 |
| 78.94328 | -0.31814 | 81.34333 | -0.39503 | 78.77652 | 0.00137 |
| 78.97659 | -0.31818 | 81.37666 | -0.39509 | 78.80984 | 0.00135 |
| 79.00995 | -0.31821 | 81.41    | -0.39514 | 78.84316 | 0.00133 |
| 79.04325 | -0.31825 | 81.44334 | -0.39519 | 78.87652 | 0.00131 |
| 79.07654 | -0.31829 | 81.47667 | -0.39524 | 78.90985 | 0.00129 |
| 79.10985 | -0.31833 | 81.50998 | -0.3953  | 78.9432  | 0.00128 |
| 79.14316 | -0.31836 | 81.54334 | -0.39535 | 78.97651 | 0.00126 |
| 79.17646 | -0.3184  | 81.57669 | -0.3954  | 79.00985 | 0.00125 |
| 79.20977 | -0.31844 | 81.61005 | -0.39546 | 79.04316 | 0.00123 |
| 79.24311 | -0.31847 | 81.64339 | -0.39551 | 79.07649 | 0.00122 |
| 79.27639 | -0.31851 | 81.67675 | -0.39557 | 79.10982 | 0.00121 |
| 79.30974 | -0.31855 | 81.71015 | -0.39562 | 79.14315 | 0.00119 |
| 79.3431  | -0.31858 | 81.74352 | -0.39568 | 79.17648 | 0.00118 |
| 79.37644 | -0.31862 | 81.77685 | -0.39573 | 79.20982 | 0.00117 |
| 79.40979 | -0.31866 | 81.81021 | -0.39579 | 79.24316 | 0.00115 |
| 79.44311 | -0.31869 | 81.84356 | -0.39584 | 79.27649 | 0.00114 |
| 79.47644 | -0.31873 | 81.8769  | -0.3959  | 79.30984 | 0.00113 |
| 79.50977 | -0.31877 | 81.91023 | -0.39595 | 79.34316 | 0.00111 |
| 79.5431  | -0.3188  | 81.94354 | -0.39601 | 79.37651 | 0.0011  |

|          |          |          |          |          |           |
|----------|----------|----------|----------|----------|-----------|
| 79.57644 | -0.31884 | 81.97685 | -0.39607 | 79.40985 | 0.00108   |
| 79.6098  | -0.31888 | 82.01015 | -0.39612 | 79.44321 | 0.00107   |
| 79.64313 | -0.31892 | 82.04348 | -0.39618 | 79.47657 | 0.00105   |
| 79.67651 | -0.31895 | 82.07682 | -0.39623 | 79.50993 | 0.00104   |
| 79.70985 | -0.31899 | 82.11015 | -0.39629 | 79.54328 | 0.00102   |
| 79.74318 | -0.31903 | 82.14349 | -0.39635 | 79.57662 | 0.001     |
| 79.77649 | -0.31907 | 82.17682 | -0.3964  | 79.60998 | 9.82E-04  |
| 79.80982 | -0.31911 | 82.21015 | -0.39646 | 79.64331 | 9.62E-04  |
| 79.84312 | -0.31915 | 82.24349 | -0.39651 | 79.67666 | 9.41E-04  |
| 79.87646 | -0.31919 | 82.27684 | -0.39657 | 79.71002 | 9.19E-04  |
| 79.90975 | -0.31923 | 82.31016 | -0.39663 | 79.74336 | 8.96E-04  |
| 79.94308 | -0.31927 | 82.34349 | -0.39668 | 79.77669 | 8.72E-04  |
| 79.97639 | -0.31931 | 82.37682 | -0.39674 | 79.81002 | 8.48E-04  |
| 80.00974 | -0.31935 | 82.41015 | -0.3968  | 79.84336 | 8.22E-04  |
| 80.0431  | -0.31939 | 82.44348 | -0.39685 | 79.87672 | 7.96E-04  |
| 80.07643 | -0.31943 | 82.4768  | -0.39691 | 79.91005 | 7.68E-04  |
| 80.10974 | -0.31947 | 82.51016 | -0.39696 | 79.94339 | 7.40E-04  |
| 80.1431  | -0.31952 | 82.54349 | -0.39702 | 79.97674 | 7.12E-04  |
| 80.17644 | -0.31956 | 82.57682 | -0.39707 | 80.01008 | 6.82E-04  |
| 80.20979 | -0.3196  | 82.61013 | -0.39713 | 80.04344 | 6.52E-04  |
| 80.24313 | -0.31965 | 82.64349 | -0.39718 | 80.07677 | 6.22E-04  |
| 80.27646 | -0.31969 | 82.6768  | -0.39724 | 80.1101  | 5.90E-04  |
| 80.30982 | -0.31973 | 82.71011 | -0.39729 | 80.14346 | 5.59E-04  |
| 80.34318 | -0.31978 | 82.74343 | -0.39735 | 80.1768  | 5.27E-04  |
| 80.37652 | -0.31983 | 82.77674 | -0.3974  | 80.21013 | 4.95E-04  |
| 80.40989 | -0.31987 | 82.81007 | -0.39746 | 80.24348 | 4.63E-04  |
| 80.44326 | -0.31992 | 82.84338 | -0.39751 | 80.27682 | 4.30E-04  |
| 80.47664 | -0.31997 | 82.8767  | -0.39757 | 80.31018 | 3.98E-04  |
| 80.51    | -0.32001 | 82.91003 | -0.39762 | 80.34354 | 3.65E-04  |
| 80.54339 | -0.32006 | 82.94334 | -0.39768 | 80.37692 | 3.33E-04  |
| 80.57677 | -0.32011 | 82.97669 | -0.39773 | 80.41028 | 3.01E-04  |
| 80.61013 | -0.32016 | 83.01007 | -0.39778 | 80.44362 | 2.69E-04  |
| 80.64352 | -0.32021 | 83.04343 | -0.39784 | 80.47697 | 2.37E-04  |
| 80.67692 | -0.32026 | 83.07682 | -0.39789 | 80.51034 | 2.06E-04  |
| 80.7103  | -0.32031 | 83.11016 | -0.39794 | 80.54369 | 1.75E-04  |
| 80.74366 | -0.32035 | 83.14351 | -0.39799 | 80.57703 | 1.45E-04  |
| 80.777   | -0.32041 | 83.17685 | -0.39805 | 80.61036 | 1.16E-04  |
| 80.81036 | -0.32046 | 83.21018 | -0.3981  | 80.64367 | 8.70E-05  |
| 80.8437  | -0.32051 | 83.24351 | -0.39815 | 80.67698 | 5.88E-05  |
| 80.87707 | -0.32056 | 83.27684 | -0.3982  | 80.71031 | 3.14E-05  |
| 80.91043 | -0.32061 | 83.31018 | -0.39826 | 80.74364 | 4.86E-06  |
| 80.94379 | -0.32066 | 83.34352 | -0.39831 | 80.77697 | -2.08E-05 |
| 80.97713 | -0.32071 | 83.37687 | -0.39836 | 80.81029 | -4.55E-05 |



|          |          |          |          |          |           |
|----------|----------|----------|----------|----------|-----------|
| 81.01048 | -0.32076 | 83.4102  | -0.39841 | 80.84362 | -6.93E-05 |
| 81.04384 | -0.32081 | 83.44354 | -0.39846 | 80.87697 | -9.21E-05 |
| 81.0772  | -0.32087 | 83.47687 | -0.39851 | 80.91028 | -1.14E-04 |
| 81.11057 | -0.32092 | 83.5102  | -0.39856 | 80.94361 | -1.34E-04 |
| 81.14395 | -0.32097 | 83.54352 | -0.39862 | 80.97693 | -1.54E-04 |
| 81.17731 | -0.32102 | 83.57685 | -0.39867 | 81.01025 | -1.72E-04 |
| 81.21066 | -0.32107 | 83.61016 | -0.39872 | 81.04354 | -1.90E-04 |
| 81.244   | -0.32113 | 83.64348 | -0.39877 | 81.07685 | -2.06E-04 |
| 81.2773  | -0.32118 | 83.67679 | -0.39882 | 81.11018 | -2.21E-04 |
| 81.31066 | -0.32123 | 83.7101  | -0.39887 | 81.14352 | -2.35E-04 |
| 81.34397 | -0.32128 | 83.74339 | -0.39892 | 81.17684 | -2.47E-04 |
| 81.37728 | -0.32133 | 83.7767  | -0.39897 | 81.21018 | -2.59E-04 |
| 81.41061 | -0.32138 | 83.81003 | -0.39902 | 81.24348 | -2.69E-04 |
| 81.44395 | -0.32143 | 83.84336 | -0.39907 | 81.27679 | -2.78E-04 |
| 81.47726 | -0.32148 | 83.87669 | -0.39912 | 81.3101  | -2.85E-04 |
| 81.51062 | -0.32153 | 83.91003 | -0.39917 | 81.34343 | -2.92E-04 |
| 81.54397 | -0.32158 | 83.94339 | -0.39922 | 81.37675 | -2.97E-04 |
| 81.5773  | -0.32163 | 83.97677 | -0.39927 | 81.41008 | -3.01E-04 |
| 81.61062 | -0.32168 | 84.01015 | -0.39932 | 81.44341 | -3.03E-04 |
| 81.64395 | -0.32173 | 84.04351 | -0.39937 | 81.47674 | -3.05E-04 |
| 81.67729 | -0.32178 | 84.07687 | -0.39942 | 81.51003 | -3.05E-04 |
| 81.71062 | -0.32182 | 84.11021 | -0.39946 | 81.54336 | -3.04E-04 |
| 81.74395 | -0.32187 | 84.14359 | -0.39951 | 81.57667 | -3.02E-04 |
| 81.77728 | -0.32192 | 84.17695 | -0.39956 | 81.60995 | -2.99E-04 |
| 81.81061 | -0.32196 | 84.21031 | -0.39961 | 81.64326 | -2.95E-04 |
| 81.84393 | -0.32201 | 84.24364 | -0.39966 | 81.67661 | -2.90E-04 |
| 81.87726 | -0.32205 | 84.27697 | -0.39971 | 81.70993 | -2.83E-04 |
| 81.91057 | -0.3221  | 84.31031 | -0.39976 | 81.74326 | -2.76E-04 |
| 81.9439  | -0.32214 | 84.34366 | -0.3998  | 81.77662 | -2.68E-04 |
| 81.97721 | -0.32219 | 84.377   | -0.39985 | 81.80995 | -2.59E-04 |
| 82.01056 | -0.32223 | 84.41034 | -0.3999  | 81.84328 | -2.50E-04 |
| 82.04387 | -0.32227 | 84.44369 | -0.39995 | 81.87659 | -2.40E-04 |
| 82.07715 | -0.32231 | 84.47702 | -0.39999 | 81.9099  | -2.29E-04 |
| 82.11046 | -0.32235 | 84.51034 | -0.40004 | 81.94323 | -2.18E-04 |
| 82.14379 | -0.32239 | 84.54366 | -0.40009 | 81.97656 | -2.06E-04 |
| 82.17711 | -0.32243 | 84.577   | -0.40014 | 82.00987 | -1.95E-04 |
| 82.21046 | -0.32247 | 84.61038 | -0.40018 | 82.0432  | -1.82E-04 |
| 82.24375 | -0.32251 | 84.6437  | -0.40023 | 82.07652 | -1.70E-04 |
| 82.27707 | -0.32254 | 84.67703 | -0.40027 | 82.10984 | -1.58E-04 |
| 82.31039 | -0.32258 | 84.71038 | -0.40032 | 82.14316 | -1.46E-04 |
| 82.34369 | -0.32261 | 84.74375 | -0.40036 | 82.17646 | -1.33E-04 |
| 82.37698 | -0.32265 | 84.7771  | -0.40041 | 82.20977 | -1.21E-04 |
| 82.41026 | -0.32268 | 84.81043 | -0.40045 | 82.24308 | -1.09E-04 |

|          |          |          |          |          |           |
|----------|----------|----------|----------|----------|-----------|
| 82.44356 | -0.32272 | 84.84377 | -0.4005  | 82.27641 | -9.74E-05 |
| 82.47685 | -0.32275 | 84.8771  | -0.40054 | 82.30974 | -8.60E-05 |
| 82.51015 | -0.32278 | 84.91043 | -0.40059 | 82.34305 | -7.49E-05 |
| 82.54343 | -0.32282 | 84.94377 | -0.40063 | 82.37636 | -6.43E-05 |
| 82.5767  | -0.32285 | 84.97715 | -0.40067 | 82.40969 | -5.40E-05 |
| 82.60998 | -0.32288 | 85.01049 | -0.40071 | 82.44302 | -4.42E-05 |
| 82.64328 | -0.32291 | 85.04379 | -0.40075 | 82.47636 | -3.47E-05 |
| 82.67656 | -0.32294 | 85.07708 | -0.4008  | 82.50969 | -2.57E-05 |
| 82.70982 | -0.32297 | 85.11034 | -0.40084 | 82.543   | -1.72E-05 |
| 82.74311 | -0.323   | 85.14364 | -0.40088 | 82.57631 | -8.97E-06 |
| 82.77641 | -0.32303 | 85.17698 | -0.40092 | 82.60964 | -1.17E-06 |
| 82.80969 | -0.32306 | 85.2103  | -0.40096 | 82.64298 | 6.28E-06  |
| 82.843   | -0.32309 | 85.24364 | -0.401   | 82.67633 | 1.34E-05  |
| 82.87629 | -0.32311 | 85.27698 | -0.40103 | 82.70967 | 2.04E-05  |
| 82.90961 | -0.32314 | 85.31033 | -0.40107 | 82.74298 | 2.71E-05  |
| 82.94292 | -0.32317 | 85.34366 | -0.40111 | 82.7763  | 3.37E-05  |
| 82.97621 | -0.3232  | 85.377   | -0.40115 | 82.80962 | 4.03E-05  |
| 83.00952 | -0.32322 | 85.41034 | -0.40118 | 82.84297 | 4.70E-05  |
| 83.04284 | -0.32325 | 85.44369 | -0.40122 | 82.87631 | 5.37E-05  |
| 83.07613 | -0.32328 | 85.47702 | -0.40125 | 82.90964 | 6.05E-05  |
| 83.10943 | -0.3233  | 85.51033 | -0.40129 | 82.94297 | 6.77E-05  |
| 83.14274 | -0.32333 | 85.54366 | -0.40132 | 82.97626 | 7.52E-05  |
| 83.17603 | -0.32336 | 85.57698 | -0.40135 | 83.00959 | 8.31E-05  |
| 83.20934 | -0.32338 | 85.61028 | -0.40139 | 83.04295 | 9.15E-05  |
| 83.24269 | -0.32341 | 85.64361 | -0.40142 | 83.07631 | 1.00E-04  |
| 83.276   | -0.32344 | 85.67693 | -0.40145 | 83.10967 | 1.10E-04  |
| 83.30934 | -0.32346 | 85.71025 | -0.40148 | 83.143   | 1.20E-04  |
| 83.34269 | -0.32349 | 85.74356 | -0.40151 | 83.17633 | 1.32E-04  |
| 83.37607 | -0.32352 | 85.7769  | -0.40154 | 83.20967 | 1.43E-04  |
| 83.40941 | -0.32354 | 85.81021 | -0.40157 | 83.24298 | 1.56E-04  |
| 83.44275 | -0.32357 | 85.84354 | -0.4016  | 83.27633 | 1.70E-04  |
| 83.47608 | -0.3236  | 85.87685 | -0.40163 | 83.30966 | 1.84E-04  |
| 83.50943 | -0.32362 | 85.91018 | -0.40165 | 83.34297 | 1.99E-04  |
| 83.54275 | -0.32365 | 85.94351 | -0.40168 | 83.37628 | 2.15E-04  |
| 83.57613 | -0.32368 | 85.97684 | -0.40171 | 83.40961 | 2.32E-04  |
| 83.60951 | -0.32371 | 86.01015 | -0.40173 | 83.44292 | 2.50E-04  |
| 83.64285 | -0.32374 | 86.04346 | -0.40176 | 83.47626 | 2.69E-04  |
| 83.67618 | -0.32377 | 86.07677 | -0.40178 | 83.50956 | 2.88E-04  |
| 83.70952 | -0.32379 | 86.11008 | -0.4018  | 83.54289 | 3.08E-04  |
| 83.74289 | -0.32382 | 86.14341 | -0.40183 | 83.57623 | 3.28E-04  |
| 83.77623 | -0.32385 | 86.1767  | -0.40185 | 83.60957 | 3.49E-04  |
| 83.80959 | -0.32388 | 86.21002 | -0.40187 | 83.64297 | 3.70E-04  |
| 83.84295 | -0.32391 | 86.24331 | -0.40189 | 83.67633 | 3.92E-04  |

|          |          |          |          |          |          |
|----------|----------|----------|----------|----------|----------|
| 83.87629 | -0.32394 | 86.27662 | -0.40191 | 83.70969 | 4.14E-04 |
| 83.90966 | -0.32398 | 86.30993 | -0.40193 | 83.74305 | 4.36E-04 |
| 83.94303 | -0.32401 | 86.34323 | -0.40195 | 83.77641 | 4.59E-04 |
| 83.97639 | -0.32404 | 86.37656 | -0.40197 | 83.80974 | 4.81E-04 |
| 84.00975 | -0.32407 | 86.40987 | -0.40199 | 83.8431  | 5.03E-04 |
| 84.0431  | -0.3241  | 86.4432  | -0.40201 | 83.87646 | 5.25E-04 |
| 84.07646 | -0.32413 | 86.47652 | -0.40203 | 83.90984 | 5.47E-04 |
| 84.10984 | -0.32417 | 86.50987 | -0.40204 | 83.9432  | 5.68E-04 |
| 84.1432  | -0.3242  | 86.54321 | -0.40206 | 83.97656 | 5.89E-04 |
| 84.17652 | -0.32423 | 86.57654 | -0.40208 | 84.00992 | 6.10E-04 |
| 84.20989 | -0.32427 | 86.60985 | -0.40209 | 84.04331 | 6.29E-04 |
| 84.24321 | -0.3243  | 86.64315 | -0.40211 | 84.07666 | 6.49E-04 |
| 84.27657 | -0.32433 | 86.67648 | -0.40213 | 84.10998 | 6.67E-04 |
| 84.30993 | -0.32437 | 86.7098  | -0.40214 | 84.14336 | 6.85E-04 |
| 84.34331 | -0.3244  | 86.74315 | -0.40216 | 84.17671 | 7.01E-04 |
| 84.37667 | -0.32444 | 86.77646 | -0.40217 | 84.21005 | 7.17E-04 |
| 84.41003 | -0.32447 | 86.8098  | -0.40218 | 84.24341 | 7.33E-04 |
| 84.44343 | -0.3245  | 86.84313 | -0.4022  | 84.27674 | 7.47E-04 |
| 84.4768  | -0.32454 | 86.87646 | -0.40221 | 84.31008 | 7.60E-04 |
| 84.51018 | -0.32457 | 86.90982 | -0.40222 | 84.34344 | 7.73E-04 |
| 84.54352 | -0.32461 | 86.94313 | -0.40224 | 84.37682 | 7.84E-04 |
| 84.5769  | -0.32464 | 86.97648 | -0.40225 | 84.41016 | 7.95E-04 |
| 84.61026 | -0.32468 | 87.00979 | -0.40226 | 84.44352 | 8.05E-04 |
| 84.64364 | -0.32471 | 87.04313 | -0.40227 | 84.47687 | 8.14E-04 |
| 84.67703 | -0.32475 | 87.07648 | -0.40229 | 84.51021 | 8.22E-04 |
| 84.71041 | -0.32478 | 87.10984 | -0.4023  | 84.54356 | 8.30E-04 |
| 84.74379 | -0.32481 | 87.1432  | -0.40231 | 84.5769  | 8.37E-04 |
| 84.77715 | -0.32485 | 87.17657 | -0.40232 | 84.61025 | 8.43E-04 |
| 84.81052 | -0.32488 | 87.20992 | -0.40233 | 84.64359 | 8.49E-04 |
| 84.8439  | -0.32491 | 87.2433  | -0.40234 | 84.6769  | 8.55E-04 |
| 84.87726 | -0.32495 | 87.27666 | -0.40235 | 84.71025 | 8.60E-04 |
| 84.91062 | -0.32498 | 87.31    | -0.40236 | 84.74357 | 8.65E-04 |
| 84.94395 | -0.32501 | 87.34338 | -0.40237 | 84.77695 | 8.70E-04 |
| 84.9773  | -0.32504 | 87.37675 | -0.40238 | 84.8103  | 8.75E-04 |
| 85.01066 | -0.32507 | 87.4101  | -0.40239 | 84.84364 | 8.79E-04 |
| 85.04403 | -0.3251  | 87.44343 | -0.4024  | 84.87697 | 8.84E-04 |
| 85.07741 | -0.32513 | 87.47677 | -0.40241 | 84.91028 | 8.90E-04 |
| 85.11075 | -0.32516 | 87.51011 | -0.40242 | 84.94359 | 8.95E-04 |
| 85.1441  | -0.32519 | 87.54348 | -0.40243 | 84.97689 | 9.01E-04 |
| 85.17746 | -0.32522 | 87.57682 | -0.40244 | 85.01023 | 9.08E-04 |
| 85.21082 | -0.32525 | 87.61018 | -0.40245 | 85.04356 | 9.15E-04 |
| 85.24415 | -0.32528 | 87.64356 | -0.40245 | 85.07689 | 9.23E-04 |
| 85.27744 | -0.3253  | 87.67692 | -0.40246 | 85.11021 | 9.31E-04 |

|          |          |          |          |          |          |
|----------|----------|----------|----------|----------|----------|
| 85.31079 | -0.32533 | 87.71025 | -0.40247 | 85.14354 | 9.41E-04 |
| 85.3441  | -0.32535 | 87.74362 | -0.40248 | 85.17687 | 9.51E-04 |
| 85.37741 | -0.32538 | 87.77698 | -0.40249 | 85.2102  | 9.63E-04 |
| 85.41072 | -0.3254  | 87.81031 | -0.40249 | 85.24352 | 9.75E-04 |
| 85.44405 | -0.32542 | 87.84367 | -0.4025  | 85.27687 | 9.88E-04 |
| 85.47736 | -0.32545 | 87.877   | -0.40251 | 85.31018 | 0.001    |
| 85.51067 | -0.32547 | 87.91036 | -0.40251 | 85.34352 | 0.00102  |
| 85.54398 | -0.32549 | 87.9437  | -0.40252 | 85.37689 | 0.00104  |
| 85.57733 | -0.32551 | 87.97703 | -0.40252 | 85.41025 | 0.00105  |
| 85.61062 | -0.32553 | 88.01038 | -0.40253 | 85.44359 | 0.00107  |
| 85.64392 | -0.32554 | 88.04372 | -0.40253 | 85.47693 | 0.0011   |
| 85.67725 | -0.32556 | 88.07705 | -0.40254 | 85.51026 | 0.00112  |
| 85.71057 | -0.32558 | 88.11039 | -0.40254 | 85.54362 | 0.00114  |
| 85.74387 | -0.32559 | 88.14374 | -0.40255 | 85.57697 | 0.00117  |
| 85.77718 | -0.32561 | 88.17707 | -0.40255 | 85.6103  | 0.00119  |
| ...      | ...      | ...      | ...      | 85.64362 | 0.00122  |
|          |          |          |          | ...      | ...      |

Raw TGA data for Fig. 4A and Fig. S2C

| Temperature | 10 min   | 20 min   | 30 min   | 45 min   | 60 min   | 90 min   | Spherical PIL |
|-------------|----------|----------|----------|----------|----------|----------|---------------|
| 26.267      | 100      | 100      | 100      | 100      | 100      | 100      | 100           |
| 28.73452    | 99.93013 | 99.82048 | 99.92379 | 99.93873 | 100.0376 | 99.93354 | 100           |
| 31.20204    | 99.88702 | 99.92902 | 100.0033 | 99.93772 | 100.073  | 99.9072  | 99.95143      |
| 33.66955    | 99.96026 | 100.0072 | 99.89206 | 99.93767 | 100.0459 | 99.89369 | 99.93302      |
| 36.13707    | 99.81387 | 99.81529 | 99.855   | 99.89631 | 100.0372 | 99.89609 | 99.9246       |
| 38.60459    | 99.79429 | 99.78634 | 99.84606 | 99.89693 | 100.0463 | 99.88118 | 99.8925       |
| 41.07211    | 99.77492 | 99.74557 | 99.89735 | 99.85213 | 100.0357 | 99.87544 | 99.88541      |
| 43.53963    | 99.72232 | 99.75013 | 99.95887 | 99.8769  | 100.0378 | 99.83384 | 99.88081      |
| 46.00714    | 99.70033 | 99.75081 | 100.0009 | 99.85013 | 100.0608 | 99.834   | 99.88439      |
| 48.47466    | 99.73653 | 99.71712 | 99.99111 | 99.83285 | 100.0449 | 99.84539 | 99.88408      |
| 50.94218    | 99.73894 | 99.78331 | 99.84581 | 99.83383 | 100.0554 | 99.8525  | 99.87473      |
| 53.4097     | 99.62187 | 99.79268 | 99.87195 | 99.8965  | 100.0462 | 99.8317  | 99.87366      |
| 55.87721    | 99.70926 | 99.82192 | 99.94748 | 99.89557 | 100.0713 | 99.81928 | 99.8846       |
| 58.34473    | 99.62618 | 99.77542 | 99.88487 | 99.87757 | 100.0558 | 99.81299 | 99.88438      |
| 60.81225    | 99.58848 | 99.78755 | 99.84594 | 99.87582 | 100.0465 | 99.79235 | 99.88878      |
| 63.27977    | 99.59348 | 99.73103 | 99.84608 | 99.83377 | 100.0462 | 99.79189 | 99.88451      |
| 65.74729    | 99.52889 | 99.70584 | 99.74618 | 99.79036 | 100.0578 | 99.77188 | 99.87489      |
| 68.2148     | 99.55224 | 99.71276 | 99.84895 | 99.83844 | 100.0369 | 99.76053 | 99.87523      |
| 70.68232    | 99.58915 | 99.71529 | 99.79466 | 99.78813 | 100.0463 | 99.76171 | 99.88448      |
| 73.14984    | 99.57597 | 99.71898 | 99.89812 | 99.83439 | 100.0673 | 99.76082 | 99.89409      |
| 75.61736    | 99.51602 | 99.68094 | 99.84232 | 99.83499 | 100.0655 | 99.76101 | 99.88457      |
| 78.08488    | 99.39625 | 99.68022 | 99.91233 | 99.85024 | 100.055  | 99.77236 | 99.89364      |
| 80.55239    | 99.40101 | 99.68152 | 99.79477 | 99.79321 | 100.0557 | 99.75371 | 99.87396      |
| 83.01991    | 99.40432 | 99.68028 | 99.79477 | 99.83387 | 100.0562 | 99.74023 | 99.89372      |
| 85.48743    | 99.43924 | 99.76046 | 99.74264 | 99.8341  | 100.074  | 99.72983 | 99.87475      |
| 87.95495    | 99.40598 | 99.78309 | 99.8454  | 99.83235 | 100.0658 | 99.76101 | 99.87731      |
| 90.42246    | 99.4398  | 99.7158  | 99.79266 | 99.8132  | 100.0744 | 99.7411  | 99.87474      |
| 92.88998    | 99.33023 | 99.63731 | 99.84607 | 99.81312 | 100.0545 | 99.72984 | 99.87475      |
| 95.3575     | 99.36621 | 99.64396 | 99.84899 | 99.76663 | 100.0556 | 99.70875 | 99.8557       |
| 97.82502    | 99.32407 | 99.60578 | 99.74727 | 99.75019 | 100.055  | 99.69753 | 99.85118      |
| 100.29254   | 99.27985 | 99.644   | 99.69229 | 99.70935 | 100.0571 | 99.69867 | 99.85548      |
| 102.76005   | 99.36403 | 99.64401 | 99.79928 | 99.7509  | 100.0651 | 99.7197  | 99.85374      |
| 105.22757   | 99.32747 | 99.50449 | 99.74193 | 99.73108 | 100.0471 | 99.69756 | 99.86498      |
| 107.69509   | 99.28787 | 99.53723 | 99.80898 | 99.73027 | 100.0557 | 99.69864 | 99.85435      |
| 110.16261   | 99.28919 | 99.50146 | 99.7948  | 99.70596 | 100.0557 | 99.69836 | 99.85276      |
| 112.63013   | 99.28863 | 99.5016  | 99.69215 | 99.7093  | 100.0834 | 99.67883 | 99.87449      |
| 115.09764   | 99.36401 | 99.5016  | 99.69217 | 99.75041 | 100.0929 | 99.69885 | 99.88411      |
| 117.56516   | 99.36409 | 99.46578 | 99.6922  | 99.75082 | 100.0836 | 99.69867 | 99.87482      |
| 120.03268   | 99.3641  | 99.43048 | 99.73297 | 99.72928 | 100.0836 | 99.67789 | 99.86487      |
| 122.5002    | 99.40226 | 99.50184 | 99.6358  | 99.73009 | 100.1022 | 99.65881 | 99.86511      |

|           |          |          |          |          |          |          |          |
|-----------|----------|----------|----------|----------|----------|----------|----------|
| 124.96771 | 99.47588 | 99.466   | 99.63901 | 99.7303  | 100.0929 | 99.6675  | 99.87412 |
| 127.43523 | 99.40145 | 99.43041 | 99.69212 | 99.75017 | 100.0836 | 99.65569 | 99.84557 |
| 129.90275 | 99.36241 | 99.35908 | 99.69215 | 99.72971 | 100.065  | 99.66749 | 99.86071 |
| 132.37027 | 99.31557 | 99.35747 | 99.68838 | 99.70929 | 100.0655 | 99.6675  | 99.86461 |
| 134.83779 | 99.36401 | 99.4304  | 99.58963 | 99.7093  | 100.093  | 99.64672 | 99.84578 |
| 137.3053  | 99.2893  | 99.43073 | 99.69215 | 99.7093  | 100.0836 | 99.65734 | 99.8646  |
| 139.77282 | 99.35107 | 99.46558 | 99.59371 | 99.68903 | 100.0836 | 99.64674 | 99.84586 |
| 142.24034 | 99.32655 | 99.46597 | 99.64042 | 99.70606 | 100.0836 | 99.64671 | 99.84584 |
| 144.70786 | 99.2519  | 99.43136 | 99.69059 | 99.68854 | 100.0736 | 99.65711 | 99.8457  |
| 147.17538 | 99.28652 | 99.43126 | 99.64078 | 99.71046 | 100.0836 | 99.63559 | 99.83621 |
| 149.64289 | 99.25181 | 99.46602 | 99.53131 | 99.68624 | 100.1023 | 99.64672 | 99.84584 |
| 152.11041 | 99.28917 | 99.50162 | 99.53155 | 99.69966 | 100.0935 | 99.63633 | 99.83621 |
| 154.57793 | 99.13901 | 99.35955 | 99.54083 | 99.68813 | 100.0743 | 99.61553 | 99.83571 |
| 157.04545 | 99.21437 | 99.4304  | 99.43561 | 99.64701 | 100.0945 | 99.61554 | 99.81694 |
| 159.51296 | 99.25397 | 99.43934 | 99.43561 | 99.66566 | 100.0844 | 99.61554 | 99.83621 |
| 161.98048 | 99.19833 | 99.35665 | 99.32841 | 99.66775 | 100.0604 | 99.59476 | 99.83601 |
| 164.448   | 99.11862 | 99.2524  | 99.3852  | 99.66774 | 100.0651 | 99.59464 | 99.80724 |
| 166.91552 | 99.13949 | 99.2168  | 99.33299 | 99.68854 | 100.065  | 99.5844  | 99.80446 |
| 169.38304 | 99.13958 | 99.1812  | 99.38436 | 99.66777 | 100.065  | 99.58437 | 99.81266 |
| 171.85055 | 99.17696 | 99.2524  | 99.33299 | 99.64701 | 100.0653 | 99.58437 | 99.81693 |
| 174.31807 | 99.21437 | 99.2524  | 99.43566 | 99.64701 | 100.0743 | 99.58437 | 99.83621 |
| 176.78559 | 99.21438 | 99.21681 | 99.43561 | 99.68798 | 100.0743 | 99.57337 | 99.82657 |
| 179.25311 | 99.13732 | 99.14187 | 99.48691 | 99.6447  | 100.0652 | 99.57406 | 99.83624 |
| 181.72063 | 99.17695 | 99.11    | 99.38413 | 99.66929 | 100.065  | 99.56365 | 99.81686 |
| 184.18814 | 99.17697 | 99.11002 | 99.33299 | 99.64701 | 100.0748 | 99.57398 | 99.82657 |
| 186.65566 | 99.13986 | 99.0723  | 99.33326 | 99.66866 | 100.0854 | 99.56355 | 99.83621 |
| 189.12318 | 99.06472 | 99.0032  | 99.37147 | 99.64687 | 100.065  | 99.5532  | 99.81694 |
| 191.5907  | 98.9899  | 98.93201 | 99.28168 | 99.66781 | 100.065  | 99.5532  | 99.81639 |
| 194.05821 | 98.9899  | 98.8608  | 99.17903 | 99.64568 | 100.0465 | 99.53233 | 99.79939 |
| 196.52573 | 98.9899  | 98.8608  | 99.12776 | 99.62626 | 100.0465 | 99.53243 | 99.7784  |
| 198.99325 | 98.9899  | 98.86082 | 99.12776 | 99.64701 | 100.0279 | 99.53243 | 99.76987 |
| 201.46077 | 98.9899  | 98.85786 | 99.02346 | 99.60548 | 100.0279 | 99.51164 | 99.75913 |
| 203.92829 | 98.95249 | 98.8608  | 99.07645 | 99.60548 | 100.0186 | 99.51165 | 99.77845 |
| 206.3958  | 98.91506 | 98.78962 | 99.02512 | 99.58455 | 100.0279 | 99.52203 | 99.76875 |
| 208.86332 | 98.91507 | 98.754   | 98.97395 | 99.58472 | 100.0279 | 99.53243 | 99.75913 |
| 211.33084 | 98.83999 | 98.6786  | 99.02514 | 99.58485 | 100.0096 | 99.52198 | 99.76877 |
| 213.79836 | 98.84025 | 98.68281 | 98.96225 | 99.54323 | 100.0279 | 99.51169 | 99.75913 |
| 216.26588 | 98.80562 | 98.68192 | 98.92252 | 99.54319 | 100.0195 | 99.50127 | 99.74975 |
| 218.73339 | 98.76543 | 98.64721 | 98.92258 | 99.49967 | 100.0093 | 99.48046 | 99.73986 |
| 221.20091 | 98.76543 | 98.61161 | 98.92252 | 99.54319 | 100.0093 | 99.48047 | 99.73986 |
| 223.66843 | 98.76543 | 98.61161 | 98.92252 | 99.54319 | 100.0093 | 99.48047 | 99.73986 |
| 226.13595 | 98.72802 | 98.57601 | 98.92252 | 99.58472 | 100      | 99.48047 | 99.73992 |
| 228.60346 | 98.72802 | 98.57601 | 98.92252 | 99.56395 | 100.0186 | 99.47007 | 99.74949 |

|           |          |          |          |          |          |          |          |
|-----------|----------|----------|----------|----------|----------|----------|----------|
| 231.07098 | 98.72805 | 98.57601 | 98.92252 | 99.56395 | 100.0186 | 99.49086 | 99.74949 |
| 233.5385  | 98.80284 | 98.57601 | 99.02567 | 99.56395 | 100.0285 | 99.49086 | 99.75913 |
| 236.00602 | 98.80284 | 98.57601 | 99.02514 | 99.56395 | 100.0279 | 99.49086 | 99.74949 |
| 238.47354 | 98.80263 | 98.57619 | 99.02514 | 99.56395 | 100.037  | 99.49086 | 99.75913 |
| 240.94105 | 98.69279 | 98.50091 | 99.02514 | 99.60531 | 100.0095 | 99.48074 | 99.74949 |
| 243.40857 | 98.72802 | 98.50481 | 98.9746  | 99.54425 | 100.0093 | 99.45969 | 99.73014 |
| 245.87609 | 98.6532  | 98.43361 | 98.87118 | 99.58472 | 100.01   | 99.45969 | 99.72031 |
| 248.34361 | 98.6532  | 98.43361 | 98.87122 | 99.54319 | 100.0093 | 99.4389  | 99.73022 |
| 250.81113 | 98.69061 | 98.46921 | 98.87122 | 99.54319 | 100.0186 | 99.4389  | 99.73613 |
| 253.27864 | 98.69061 | 98.46921 | 98.92252 | 99.56395 | 100.0186 | 99.44929 | 99.73986 |
| 255.74616 | 98.69061 | 98.50481 | 98.92252 | 99.56395 | 100.0186 | 99.44929 | 99.74947 |
| 258.21368 | 98.69059 | 98.50483 | 99.02512 | 99.56395 | 100.0186 | 99.47007 | 99.74949 |
| 260.6812  | 98.61579 | 98.43361 | 99.02514 | 99.56395 | 100      | 99.47052 | 99.73021 |
| 263.14871 | 98.61578 | 98.43361 | 98.92252 | 99.52243 | 100.0093 | 99.44929 | 99.72957 |
| 265.61623 | 98.58221 | 98.3977  | 98.92252 | 99.58488 | 100.0093 | 99.44929 | 99.74949 |
| 268.08375 | 98.54096 | 98.32681 | 98.92252 | 99.58474 | 99.99071 | 99.44925 | 99.7111  |
| 270.55127 | 98.54121 | 98.29115 | 98.82275 | 99.56395 | 99.98147 | 99.42851 | 99.71096 |
| 273.01879 | 98.50355 | 98.25561 | 98.86655 | 99.56396 | 99.97213 | 99.41923 | 99.70132 |
| 275.4863  | 98.46614 | 98.22001 | 98.81991 | 99.54319 | 99.96284 | 99.40771 | 99.69174 |
| 277.95382 | 98.42878 | 98.25557 | 98.7686  | 99.52243 | 99.96284 | 99.39734 | 99.69169 |
| 280.42134 | 98.42873 | 98.21984 | 98.7686  | 99.52243 | 99.96284 | 99.39734 | 99.69169 |
| 282.88886 | 98.39196 | 98.14822 | 98.7686  | 99.52243 | 99.95351 | 99.38728 | 99.69169 |
| 285.35638 | 98.39162 | 98.14882 | 98.76859 | 99.52392 | 99.96283 | 99.36535 | 99.68205 |
| 287.82389 | 98.31723 | 98.0414  | 98.71729 | 99.50166 | 99.95373 | 99.36617 | 99.68205 |
| 290.29141 | 98.24709 | 97.9703  | 98.71729 | 99.50171 | 99.96033 | 99.34538 | 99.66673 |
| 292.75893 | 98.16685 | 97.93521 | 98.58017 | 99.46014 | 99.93497 | 99.32712 | 99.65315 |
| 295.22645 | 98.16685 | 97.93521 | 98.46075 | 99.43937 | 99.93511 | 99.32461 | 99.65315 |
| 297.69396 | 98.16685 | 97.89961 | 98.46075 | 99.43937 | 99.91639 | 99.31421 | 99.6548  |
| 300.16148 | 98.16685 | 97.89961 | 98.46075 | 99.43937 | 99.89771 | 99.30374 | 99.63388 |
| 302.629   | 98.16685 | 97.89961 | 98.46075 | 99.39872 | 99.89781 | 99.29336 | 99.63388 |
| 305.09652 | 98.2416  | 97.97493 | 98.46075 | 99.39785 | 99.91639 | 99.29343 | 99.64346 |
| 307.56404 | 98.20427 | 97.90014 | 98.5634  | 99.4186  | 99.89769 | 99.31421 | 99.63388 |
| 310.03155 | 98.16885 | 97.8291  | 98.56337 | 99.4186  | 99.87397 | 99.29343 | 99.62424 |
| 312.49907 | 98.04715 | 97.72485 | 98.51206 | 99.4186  | 99.8367  | 99.27338 | 99.59516 |
| 314.96659 | 97.84592 | 97.6143  | 98.40941 | 99.37674 | 99.80482 | 99.24193 | 99.5568  |
| 317.43411 | 97.71799 | 97.58114 | 98.30793 | 99.31479 | 99.76775 | 99.2082  | 99.54442 |
| 319.90163 | 97.6069  | 97.43297 | 98.2042  | 99.25306 | 99.73127 | 99.17918 | 99.51826 |
| 322.36914 | 97.50042 | 97.36553 | 98.10179 | 99.20915 | 99.69158 | 99.13657 | 99.5003  |
| 324.83666 | 97.34255 | 97.18998 | 97.89503 | 99.14808 | 99.63782 | 99.09605 | 99.43161 |
| 327.30418 | 97.08027 | 97.04578 | 97.69171 | 99.04524 | 99.55295 | 99.03366 | 99.35955 |
| 329.7717  | 96.78288 | 96.75993 | 97.48599 | 98.95865 | 99.44264 | 98.98118 | 99.28797 |
| 332.23921 | 96.44437 | 96.51223 | 97.37871 | 98.83737 | 99.30231 | 98.87913 | 99.18891 |
| 334.70673 | 96.1068  | 96.19032 | 97.08062 | 98.68957 | 99.11193 | 98.75066 | 99.06664 |

|           |          |          |          |          |          |          |          |
|-----------|----------|----------|----------|----------|----------|----------|----------|
| 337.17425 | 95.69829 | 95.75732 | 96.6113  | 98.4877  | 98.79072 | 98.55977 | 98.87961 |
| 339.64177 | 95.17555 | 95.24186 | 96.25421 | 98.21129 | 98.41962 | 98.31258 | 98.59348 |
| 342.10929 | 94.61078 | 94.58318 | 95.73934 | 97.79871 | 98.03425 | 97.92468 | 98.12954 |
| 344.5768  | 93.89872 | 93.80264 | 95.04757 | 97.29257 | 97.48285 | 97.42489 | 97.65913 |
| 347.04432 | 93.00543 | 92.76889 | 94.24762 | 96.55412 | 96.60359 | 96.8647  | 97.11829 |
| 349.51184 | 91.75224 | 91.67528 | 93.30629 | 95.62508 | 95.70909 | 96.03125 | 96.30418 |
| 351.97936 | 90.21263 | 90.26738 | 92.21467 | 94.67288 | 94.66278 | 95.14494 | 95.37552 |
| 354.44688 | 88.49174 | 88.58974 | 90.71058 | 93.39786 | 93.37533 | 94.0358  | 94.26681 |
| 356.91439 | 86.76706 | 86.72552 | 88.78137 | 91.89763 | 91.91937 | 92.71125 | 92.70854 |
| 359.38191 | 84.9842  | 84.74959 | 86.58419 | 90.02915 | 90.32501 | 91.16235 | 90.61354 |
| 361.84943 | 83.21976 | 82.92005 | 84.43224 | 88.20075 | 88.61461 | 89.45247 | 88.29975 |
| 364.31695 | 81.51428 | 81.11966 | 82.39599 | 86.30427 | 86.99642 | 87.67327 | 85.94837 |
| 366.78446 | 79.86591 | 79.44824 | 80.53797 | 84.47248 | 85.51622 | 85.94905 | 83.66663 |
| 369.25198 | 78.44806 | 77.89025 | 78.54717 | 82.77189 | 84.17581 | 84.36127 | 81.55274 |
| 371.7195  | 76.84208 | 76.42827 | 76.80777 | 81.35791 | 82.91002 | 82.93055 | 79.70122 |
| 374.18702 | 75.30125 | 74.86545 | 75.05395 | 79.85939 | 81.78578 | 81.63129 | 77.95102 |
| 376.65454 | 73.92404 | 73.50336 | 73.10953 | 78.44941 | 80.71731 | 80.51017 | 76.31197 |
| 379.12205 | 72.57647 | 72.06755 | 71.31775 | 77.28707 | 79.72175 | 79.49752 | 74.8254  |
| 381.58957 | 70.94915 | 70.60658 | 69.52472 | 76.05283 | 78.72226 | 78.57394 | 73.46594 |
| 384.05709 | 69.46707 | 69.06723 | 67.7318  | 74.82846 | 77.71366 | 77.70395 | 72.15216 |
| 386.52461 | 67.93326 | 67.62663 | 65.73741 | 73.62356 | 76.693   | 76.87746 | 70.84391 |
| 388.99213 | 66.32194 | 66.02491 | 63.78328 | 72.39262 | 75.6215  | 76.02704 | 69.61444 |
| 391.45964 | 64.62006 | 64.39943 | 61.63535 | 71.17961 | 74.50216 | 75.20261 | 68.36742 |
| 393.92716 | 62.80835 | 62.75372 | 59.51199 | 69.93562 | 73.3091  | 74.4625  | 67.10793 |
| 396.39468 | 60.98435 | 60.88898 | 57.25603 | 68.62307 | 72.05709 | 73.61017 | 65.77057 |
| 398.8622  | 59.16518 | 59.09565 | 54.93244 | 67.29227 | 70.71042 | 72.74584 | 64.43396 |
| 401.32971 | 57.13939 | 57.09378 | 52.43671 | 65.76877 | 69.30307 | 71.87376 | 63.09451 |
| 403.79723 | 55.08137 | 55.07168 | 49.88549 | 64.36355 | 67.8407  | 70.97842 | 61.78767 |
| 406.26475 | 52.92725 | 52.60704 | 47.36625 | 62.76297 | 66.25895 | 70.03478 | 60.48428 |
| 408.73227 | 50.55326 | 50.47838 | 44.58043 | 61.14589 | 64.62848 | 69.03823 | 59.18664 |
| 411.19979 | 47.97201 | 47.77588 | 41.73135 | 59.37239 | 62.9724  | 67.943   | 57.88547 |
| 413.6673  | 45.44523 | 45.30019 | 38.79304 | 57.57209 | 61.23511 | 66.823   | 56.53495 |
| 416.13482 | 42.59597 | 42.41378 | 35.87202 | 55.62681 | 59.44081 | 65.57318 | 55.17376 |
| 418.60234 | 39.5384  | 39.39686 | 32.81737 | 53.5376  | 57.59132 | 64.23467 | 53.75059 |
| 421.06986 | 36.39978 | 36.30637 | 29.27018 | 51.29846 | 55.70961 | 62.81237 | 52.24298 |
| 423.53738 | 33.0721  | 33.13883 | 26.42652 | 48.89446 | 53.74851 | 61.22914 | 50.63258 |
| 426.00489 | 29.60754 | 29.72003 | 23.35995 | 46.28914 | 51.75567 | 59.58235 | 49.01301 |
| 428.47241 | 25.89949 | 26.14994 | 20.669   | 43.56326 | 49.58694 | 57.75625 | 47.32263 |
| 430.93993 | 22.25364 | 22.64069 | 18.06485 | 40.61464 | 47.36834 | 55.75416 | 45.56934 |
| 433.40745 | 18.59376 | 19.05551 | 15.92599 | 37.49533 | 45.07578 | 53.59067 | 43.72746 |
| 435.87496 | 15.18121 | 15.83903 | 14.23098 | 34.26692 | 42.71501 | 51.25297 | 41.79206 |
| 438.34248 | 12.84118 | 13.57175 | 12.72106 | 30.7126  | 40.28983 | 48.71621 | 39.71297 |
| 440.81    | 10.86523 | 11.66682 | 11.63929 | 27.14689 | 37.78148 | 46.02241 | 37.57641 |



|           |         |          |          |          |          |          |          |
|-----------|---------|----------|----------|----------|----------|----------|----------|
| 443.27752 | 9.31622 | 10.20126 | 10.82561 | 23.46278 | 35.20716 | 43.12899 | 35.36177 |
| 445.74504 | 8.38081 | 9.2387   | 10.27148 | 19.87717 | 32.60718 | 40.06644 | 33.04597 |
| 448.21255 | 7.89885 | 8.68765  | 9.69511  | 16.47612 | 29.98698 | 36.7927  | 30.5861  |
| 450.68007 | 7.45854 | 8.25491  | 9.33577  | 13.54851 | 27.31422 | 33.29539 | 28.07595 |
| 453.14759 | 7.14648 | 7.93733  | 9.08227  | 11.67255 | 24.52924 | 29.76128 | 25.51043 |
| 455.61511 | 6.9572  | 7.72759  | 8.82511  | 10.54165 | 21.63406 | 26.04234 | 22.86436 |
| 458.08263 | 6.80883 | 7.49594  | 8.67069  | 9.62364  | 18.77244 | 22.28286 | 20.15892 |
| 460.55014 | 6.73401 | 7.36915  | 8.5685   | 8.9842   | 16.00738 | 18.64351 | 17.46292 |
| 463.01766 | 6.73404 | 7.29799  | 8.51719  | 8.51571  | 13.59914 | 15.34016 | 14.77071 |
| 465.48518 | 6.65874 | 7.22288  | 8.41457  | 8.18908  | 11.88043 | 12.77787 | 12.47176 |
| 467.9527  | 6.69659 | 7.19117  | 8.36326  | 7.95423  | 10.84615 | 11.30764 | 10.91009 |
| 470.42021 | 6.69659 | 7.19117  | 8.41457  | 7.80139  | 10.17032 | 10.38257 | 9.93262  |
| 472.88773 | 6.62178 | 7.19117  | 8.41457  | 7.66021  | 9.6656   | 9.76165  | 9.32378  |
| 475.35525 | 6.62178 | 7.19117  | 8.41457  | 7.55652  | 9.29415  | 9.25106  | 8.83483  |
| 477.82277 | 6.62178 | 7.17533  | 8.41457  | 7.49595  | 9.02978  | 8.87975  | 8.49625  |
| 480.29029 | 6.58436 | 7.04877  | 8.41456  | 7.45432  | 8.83814  | 8.64688  | 8.29784  |
| 482.7578  | 6.54695 | 7.04877  | 8.36327  | 7.45624  | 8.67515  | 8.45775  | 8.11257  |
| 485.22532 | 6.54695 | 7.04877  | 8.20934  | 7.37126  | 8.5763   | 8.28624  | 7.98565  |
| 487.69284 | 6.50959 | 7.04877  | 8.20934  | 7.35048  | 8.50057  | 8.15666  | 7.89063  |
| 490.16036 | 6.50952 | 7.04877  | 8.20934  | 7.3505   | 8.42618  | 8.07298  | 7.80181  |
| 492.62788 | 6.47213 | 6.97758  | 8.20934  | 7.3505   | 8.3706   | 7.98016  | 7.77467  |
| 495.09539 | 6.50936 | 7.01561  | 8.20934  | 7.3505   | 8.34262  | 7.91777  | 7.73678  |
| 497.56291 | 6.54688 | 7.05158  | 8.20934  | 7.32973  | 8.33243  | 7.87759  | 7.71693  |
| 500.03043 | 6.54695 | 6.97757  | 8.26065  | 7.3505   | 8.32402  | 7.85535  | 7.68861  |
| 502.49795 | 6.54695 | 6.97757  | 8.31195  | 7.37126  | 8.30546  | 7.84497  | 7.67896  |
| 504.96546 | 6.54689 | 6.97757  | 8.31195  | 7.32973  | 8.30546  | 7.82418  | 7.65971  |
| 507.43298 | 6.51032 | 7.01317  | 8.31195  | 7.32974  | 8.28677  | 7.8138   | 7.6597   |
| 509.9005  | 6.47213 | 6.97757  | 8.35862  | 7.34913  | 8.27085  | 7.81274  | 7.6597   |
| 512.36802 | 6.50981 | 7.01317  | 8.36326  | 7.3505   | 8.26831  | 7.82419  | 7.6595   |
| 514.83554 | 6.47447 | 7.01266  | 8.36326  | 7.3505   | 8.2776   | 7.81414  | 7.62989  |
| 517.30305 | 6.50954 | 7.08437  | 8.41457  | 7.37121  | 8.29617  | 7.80299  | 7.65927  |
| 519.77057 | 6.50954 | 7.04877  | 8.51719  | 7.37127  | 8.27759  | 7.80336  | 7.67897  |
| 522.23809 | 6.50954 | 7.01317  | 8.51719  | 7.37127  | 8.27759  | 7.8034   | 7.67893  |
| 524.70561 | 6.50954 | 7.01311  | 8.51719  | 7.37127  | 8.2683   | 7.79292  | 7.6597   |
| 527.17313 | 6.50954 | 6.97757  | 8.51719  | 7.37127  | 8.25901  | 7.76184  | 7.6597   |
| 529.64064 | 6.50954 | 6.97757  | 8.51719  | 7.37127  | 8.25901  | 7.76184  | 7.64043  |
| 532.10816 | 6.54716 | 7.04877  | 8.40559  | 7.37127  | 8.24791  | 7.76202  | 7.64043  |
| 534.57568 | 6.47213 | 7.04877  | 8.41457  | 7.37258  | 8.26014  | 7.76343  | 7.64043  |
| 537.0432  | 6.47213 | 7.01317  | 8.41457  | 7.37126  | 8.24043  | 7.74107  | 7.64053  |
| 539.51071 | 6.43475 | 6.97757  | 8.31196  | 7.37126  | 8.24039  | 7.72025  | 7.62115  |
| 541.97823 | 6.3599  | 6.94205  | 8.31179  | 7.28873  | 8.23125  | 7.70832  | 7.60354  |
| 544.44575 | 6.3599  | 6.94199  | 8.31195  | 7.28821  | 8.21256  | 7.6995   | 7.60188  |
| 546.91327 | 6.32248 | 6.87077  | 8.31195  | 7.28821  | 8.21256  | 7.69272  | 7.59225  |

|           |         |         |         |         |         |         |         |
|-----------|---------|---------|---------|---------|---------|---------|---------|
| 549.38079 | 6.32248 | 6.83518 | 8.31191 | 7.26746 | 8.18472 | 7.68928 | 7.56263 |
| 551.8483  | 6.32248 | 6.76397 | 8.26065 | 7.24668 | 8.18434 | 7.65796 | 7.55377 |
| 554.31582 | 6.32066 | 6.76397 | 8.26065 | 7.24668 | 8.15679 | 7.64755 | 7.54325 |
| 556.78334 | 6.24766 | 6.76397 | 8.15803 | 7.22626 | 8.15528 | 7.64755 | 7.52481 |
| 559.25086 | 6.17234 | 6.76397 | 8.15803 | 7.20515 | 8.13824 | 7.64755 | 7.52481 |
| 561.71838 | 6.13542 | 6.69277 | 8.10672 | 7.18438 | 8.11966 | 7.63715 | 7.50554 |
| 564.18589 | 6.21025 | 6.69278 | 8.10672 | 7.18438 | 8.11037 | 7.63714 | 7.50554 |
| 566.65341 | 6.17216 | 6.69283 | 8.10668 | 7.18439 | 8.12894 | 7.62298 | 7.51278 |
| 569.12093 | 6.13543 | 6.72837 | 8.15802 | 7.20515 | 8.11037 | 7.60602 | 7.50554 |
| 571.58845 | 6.09802 | 6.72837 | 8.15803 | 7.18439 | 8.09179 | 7.60566 | 7.48627 |
| 574.05596 | 6.0606  | 6.72837 | 8.10672 | 7.18439 | 8.07321 | 7.5852  | 7.46712 |
| 576.52348 | 6.0606  | 6.72832 | 8.10671 | 7.16363 | 8.07321 | 7.5852  | 7.45737 |
| 578.991   | 6.0606  | 6.65717 | 8.00637 | 7.12209 | 8.05462 | 7.56442 | 7.44773 |
| 581.45852 | 6.0232  | 6.58598 | 7.95279 | 7.12209 | 8.05462 | 7.55403 | 7.44773 |
| 583.92604 | 5.98579 | 6.55038 | 7.95279 | 7.12209 | 8.02688 | 7.5443  | 7.41882 |
| 586.39355 | 5.94269 | 6.54984 | 7.90138 | 7.12209 | 8.00879 | 7.53325 | 7.39956 |
| 588.86107 | 6.02319 | 6.62158 | 7.85018 | 7.12208 | 8.00935 | 7.53332 | 7.39956 |
| 591.32859 | 6.09848 | 6.69554 | 7.9528  | 7.12209 | 8.00817 | 7.53325 | 7.39956 |
| 593.79611 | 6.09801 | 6.65717 | 7.9528  | 7.12209 | 8.02676 | 7.52286 | 7.38029 |
| 596.26363 | 6.09801 | 6.65717 | 8.05541 | 7.16362 | 8.02675 | 7.5335  | 7.39956 |
| 598.73114 | 6.0974  | 6.65715 | 8.05541 | 7.16362 | 8.00817 | 7.52278 | 7.38992 |
| 601.19866 | 6.17284 | 6.72837 | 8.00411 | 7.1221  | 7.98921 | 7.50208 | 7.3881  |
| 603.66618 | 6.17577 | 6.72837 | 8.10725 | 7.10174 | 7.9896  | 7.50208 | 7.38992 |
| 606.1337  | 6.09802 | 6.69277 | 8.0041  | 7.10133 | 7.9896  | 7.50208 | 7.38029 |
| 608.60121 | 6.09681 | 6.65716 | 8.0041  | 7.10133 | 7.97102 | 7.48129 | 7.36082 |
| 611.06873 | 6.02319 | 6.62224 | 8.0041  | 7.08056 | 7.97213 | 7.46115 | 7.35136 |
| 613.53625 | 5.9857  | 6.54451 | 7.90149 | 7.08056 | 7.94298 | 7.46052 | 7.34175 |
| 616.00377 | 5.98578 | 6.47917 | 7.90149 | 7.03904 | 7.92458 | 7.45012 | 7.34173 |
| 618.47129 | 5.94295 | 6.47917 | 7.85018 | 6.99751 | 7.91527 | 7.43973 | 7.31284 |
| 620.9388  | 5.94837 | 6.51477 | 7.85018 | 6.99751 | 7.90608 | 7.43973 | 7.31284 |
| 623.40632 | 5.98578 | 6.55099 | 7.90148 | 7.0184  | 7.90598 | 7.44417 | 7.30321 |
| 625.87384 | 5.98578 | 6.47918 | 7.95283 | 7.03861 | 7.90598 | 7.42229 | 7.31284 |
| 628.34136 | 5.98578 | 6.47918 | 7.85167 | 7.01872 | 7.90598 | 7.42935 | 7.29358 |
| 630.80888 | 5.91096 | 6.47918 | 7.85018 | 6.9975  | 7.8874  | 7.41895 | 7.29576 |
| 633.27639 | 5.94829 | 6.51776 | 7.85018 | 6.97674 | 7.86899 | 7.40819 | 7.27431 |
| 635.74391 | 5.91097 | 6.51478 | 7.85018 | 6.97862 | 7.87817 | 7.39817 | 7.27433 |
| 638.21143 | 5.87456 | 6.44356 | 7.90149 | 6.95598 | 7.87811 | 7.38778 | 7.2743  |
| 640.67895 | 5.91096 | 6.40798 | 7.90149 | 6.91121 | 7.87811 | 7.36698 | 7.2743  |
| 643.14646 | 5.87355 | 6.40798 | 7.9528  | 6.93522 | 7.86882 | 7.36648 | 7.27531 |
| 645.61398 | 5.87355 | 6.39804 | 7.9528  | 6.93522 | 7.87113 | 7.35661 | 7.25397 |
| 648.0815  | 5.87356 | 6.33678 | 7.84932 | 6.93217 | 7.85036 | 7.35661 | 7.2454  |
| 650.54902 | 5.83614 | 6.30118 | 7.85018 | 6.89368 | 7.83166 | 7.33577 | 7.2454  |
| 653.01654 | 5.79873 | 6.30118 | 7.85018 | 6.85216 | 7.81219 | 7.32544 | 7.22592 |

|           |         |         |         |         |         |         |         |
|-----------|---------|---------|---------|---------|---------|---------|---------|
| 655.48405 | 5.76132 | 6.30118 | 7.79412 | 6.87234 | 7.80378 | 7.30465 | 7.19723 |
| 657.95157 | 5.68649 | 6.22998 | 7.74762 | 6.87293 | 7.7945  | 7.29407 | 7.17796 |
| 660.41909 | 5.68649 | 6.22998 | 7.64505 | 6.8115  | 7.76668 | 7.26518 | 7.15869 |
| 662.88661 | 5.68649 | 6.22998 | 7.64494 | 6.81063 | 7.75734 | 7.2527  | 7.15869 |
| 665.35413 | 5.64909 | 6.22998 | 7.64494 | 6.7899  | 7.74778 | 7.24199 | 7.15869 |
| 667.82164 | 5.72391 | 6.30117 | 7.64494 | 6.78987 | 7.7188  | 7.22153 | 7.15869 |
| 670.28916 | 5.7239  | 6.33671 | 7.64459 | 6.78987 | 7.73876 | 7.23193 | 7.15974 |
| 672.75668 | 5.76196 | 6.37236 | 7.69633 | 6.78755 | 7.72947 | 7.24231 | 7.15901 |
| 675.2242  | 5.79872 | 6.37236 | 7.79887 | 6.8102  | 7.73876 | 7.24223 | 7.15868 |
| 677.69171 | 5.72391 | 6.37255 | 7.79887 | 6.81063 | 7.74805 | 7.2527  | 7.16832 |
| 680.15923 | 5.72391 | 6.30088 | 7.79887 | 6.78987 | 7.72947 | 7.24363 | 7.15869 |
| 682.62675 | 5.72391 | 6.26557 | 7.79887 | 6.7691  | 7.71089 | 7.23188 | 7.13942 |
| 685.09427 | 5.64908 | 6.26557 | 7.79887 | 6.72758 | 7.7016  | 7.20075 | 7.1295  |
| 687.56179 | 5.64908 | 6.26557 | 7.79887 | 6.72758 | 7.70209 | 7.19037 | 7.12015 |
| 690.0293  | 5.64909 | 6.26552 | 7.79887 | 6.72758 | 7.69231 | 7.19035 | 7.11048 |
| 692.49682 | 5.7239  | 6.30117 | 7.79887 | 6.72758 | 7.68302 | 7.16988 | 7.11051 |
| 694.96434 | 5.72218 | 6.22997 | 7.90149 | 6.76911 | 7.69229 | 7.19032 | 7.11895 |
| 697.43186 | 5.64909 | 6.22998 | 7.85018 | 6.76911 | 7.68301 | 7.18018 | 7.09124 |
| 699.89938 | 5.64909 | 6.22998 | 7.79887 | 6.75125 | 7.67373 | 7.16957 | 7.09124 |
| 702.36689 | 5.72391 | 6.22998 | 7.74756 | 6.72757 | 7.66443 | 7.15911 | 7.07198 |
| 704.83441 | 5.72391 | 6.22998 | 7.85017 | 6.76824 | 7.66444 | 7.16489 | 7.09125 |
| 707.30193 | 5.64903 | 6.22998 | 7.79888 | 6.7691  | 7.66444 | 7.14878 | 7.07197 |
| 709.76945 | 5.6865  | 6.22997 | 7.69626 | 6.7691  | 7.64586 | 7.12802 | 7.04269 |
| 712.23696 | 5.64908 | 6.22997 | 7.79887 | 6.76905 | 7.66444 | 7.14876 | 7.06234 |
| 714.70448 | 5.64624 | 6.22997 | 7.79887 | 6.72758 | 7.66444 | 7.12801 | 7.06234 |
| 717.172   | 5.68649 | 6.30117 | 7.79887 | 6.72758 | 7.64586 | 7.12798 | 7.0527  |
| 719.63952 | 5.68649 | 6.30117 | 7.90149 | 6.7691  | 7.66444 | 7.12802 | 7.06234 |
| 722.10704 | 5.68649 | 6.29967 | 7.90149 | 6.76911 | 7.64588 | 7.12801 | 7.05269 |
| 724.57455 | 5.64925 | 6.22998 | 7.79848 | 6.76911 | 7.62727 | 7.12801 | 7.0527  |
| 727.04207 | 5.64909 | 6.22998 | 7.79887 | 6.74834 | 7.61806 | 7.12801 | 7.0527  |
| 729.50959 | 5.64904 | 6.22998 | 7.79887 | 6.72757 | 7.60869 | 7.11763 | 7.03343 |
| 731.97711 | 5.57431 | 6.19438 | 7.69625 | 6.70681 | 7.59941 | 7.11762 | 7.03343 |
| 734.44463 | 5.64908 | 6.26557 | 7.69625 | 6.70681 | 7.59012 | 7.10723 | 7.0238  |
| 736.91214 | 5.64908 | 6.26557 | 7.69565 | 6.74834 | 7.5994  | 7.11763 | 7.04307 |
| 739.37966 | 5.64907 | 6.30118 | 7.69625 | 6.74834 | 7.59017 | 7.11763 | 7.00443 |
| 741.84718 | 5.6865  | 6.33677 | 7.69624 | 6.74801 | 7.58084 | 7.11144 | 7.01416 |
| 744.3147  | 5.6865  | 6.30116 | 7.74756 | 6.74834 | 7.57154 | 7.12801 | 7.0238  |
| 746.78222 | 5.6865  | 6.30117 | 7.69625 | 6.74834 | 7.57153 | 7.11761 | 7.00453 |
| 749.24973 | 5.6865  | 6.30159 | 7.64495 | 6.74834 | 7.55296 | 7.10723 | 6.99489 |
| 751.71725 | 5.64907 | 6.26558 | 7.64495 | 6.74834 | 7.55296 | 7.07395 | 6.98528 |
| 754.18477 | 5.57426 | 6.26558 | 7.64877 | 6.74834 | 7.55296 | 7.07606 | 6.97562 |
| 756.65229 | 5.57426 | 6.23004 | 7.59363 | 6.72758 | 7.53437 | 7.05528 | 6.97562 |
| 759.1198  | 5.57426 | 6.15878 | 7.54231 | 6.72758 | 7.53437 | 7.05528 | 6.97561 |

|           |         |         |         |         |         |         |         |
|-----------|---------|---------|---------|---------|---------|---------|---------|
| 761.58732 | 5.57426 | 6.12318 | 7.54233 | 6.72758 | 7.52509 | 7.0345  | 6.96598 |
| 764.05484 | 5.57426 | 6.12318 | 7.54233 | 6.72758 | 7.51459 | 7.0345  | 6.95337 |
| 766.52236 | 5.49578 | 6.12703 | 7.39688 | 6.72759 | 7.51579 | 7.01371 | 6.92745 |
| 768.98988 | 5.53683 | 6.12314 | 7.3884  | 6.70681 | 7.50651 | 7.00332 | 6.90804 |
| 771.45739 | 5.52851 | 6.05189 | 7.36028 | 6.72695 | 7.5065  | 7.00601 | 6.91782 |
| 773.92491 | 5.49944 | 6.08758 | 7.43817 | 6.72757 | 7.51579 | 7.02411 | 6.92642 |
| 776.39243 | 5.50044 | 6.08865 | 7.49102 | 6.70685 | 7.51579 | 7.02413 | 6.92759 |
| 778.85995 | 5.53685 | 6.0492  | 7.49248 | 6.70665 | 7.52508 | 7.02411 | 6.91758 |
| 781.32747 | 5.53685 | 6.05197 | 7.43966 | 6.71076 | 7.50664 | 7.02649 | 6.91782 |

Raw Size data for Fig. 3G, Fig. 6D, Fig. 7G, Fig. 8E, Fig. 9F, Fig. 10E

| Time/min | L/ $\mu\text{m}$ | D/ $\mu\text{m}$ | d/ $\mu\text{m}$ | L/D     |
|----------|------------------|------------------|------------------|---------|
| 10       | 0.73             | 0.73             | --               | 1       |
| 20       | 1.00             | 1.00             | --               | 1       |
| 30       | 1.10             | 1.10             | --               | 1       |
| 45       | 1.73             | 1.51             | 0.90             | 1.14570 |
| 60       | 1.68             | 1.13             | 1.02             | 1.48673 |
| 90       | 1.65             | 1.20             | 1.05             | 1.37500 |

| IL/g | L/ $\mu\text{m}$ | D/ $\mu\text{m}$ | d/ $\mu\text{m}$ | L/D     |
|------|------------------|------------------|------------------|---------|
| 1.0  | 1.96             | 1.14             | 0.97             | 1.71930 |
| 1.5  | 1.81             | 1.26             | 1.17             | 1.43651 |
| 2.0  | 1.80             | 1.19             | 1.12             | 1.51261 |

| DVB/ $\mu\text{L}$ | L/ $\mu\text{m}$ | D/ $\mu\text{m}$ | d/ $\mu\text{m}$ | L/D     |
|--------------------|------------------|------------------|------------------|---------|
| 4.0                | 1.76             | 1.24             | 1.05             | 1.41935 |
| 3.0                | 1.90             | 1.36             | 1.17             | 1.39706 |
| 2.8                | 1.75             | 1.17             | 1.00             | 1.49573 |
| 2.7                | 1.78             | 1.61             | 1.08             | 1.10559 |
| 2.5                | 1.64             | 1.64             | --               | 1       |
| 0                  | 1.57             | 1.57             | --               | 1       |

| AIBN/mg | L/ $\mu\text{m}$ | D/ $\mu\text{m}$ | d/ $\mu\text{m}$ | L/D     |
|---------|------------------|------------------|------------------|---------|
| 6.0     | 1.6              | 1.60             | --               | 1       |
| 8.0     | 1.95             | 1.42             | 1.25             | 1.37324 |
| 10.0    | 1.93             | 1.30             | 1.18             | 1.48462 |
| 12.0    | 1.91             | 1.29             | 1.17             | 1.48062 |

| EtOH/mL | L/ $\mu\text{m}$ | D/ $\mu\text{m}$ | d/ $\mu\text{m}$ | L/D     |
|---------|------------------|------------------|------------------|---------|
| 10.5    | 1.79             | 1.59             | 1.06             | 1.12579 |
| 12.5    | 1.75             | 1.27             | 1.13             | 1.37795 |
| 13.5    | 1.59             | 1.25             | 1.05             | 1.27200 |
| 15.0    | 1.56             | 1.43             | 0.92             | 1.09091 |
| 16.5    | 1.51             | 1.51             | --               | 1       |

| T/ $^{\circ}\text{C}$ | L/ $\mu\text{m}$ | D/ $\mu\text{m}$ | d/ $\mu\text{m}$ | L/D     |
|-----------------------|------------------|------------------|------------------|---------|
| 57                    | 1.30             | 1.30             | --               | 1       |
| 60                    | 1.64             | 1.64             | --               | 1       |
| 62                    | 1.68             | 1.54             | 0.78             | 1.09091 |
| 65                    | 1.73             | 1.25             | 1.10             | 1.38400 |

Raw yield data for Fig. 3H, Fig. 6E, Fig. 7H, Fig. 8F, Fig. 9G, Fig. 10F

| Time/min | yield(%) |
|----------|----------|
| 10       | 5        |
| 20       | 10       |
| 30       | 43       |
| 45       | 67       |
| 60       | 70       |
| 90       | 73       |

| IL/g | yield(%) |
|------|----------|
| 1.0  | 66       |
| 1.5  | 78       |
| 2.0  | 80       |

| DVB/ $\mu$ L | yield(%) |
|--------------|----------|
| 4.0          | 73       |
| 3.0          | 66       |
| 2.8          | 65       |
| 2.7          | 62       |
| 2.5          | 60       |
| 0            | 48       |

| AIBN/mg | yield(%) |
|---------|----------|
| 6.0     | 50       |
| 8.0     | 70       |
| 10.0    | 75       |
| 12.0    | 80       |

| EtOH/mL | yield(%) |
|---------|----------|
| 10.5    | 81       |
| 12.5    | 78       |
| 13.5    | 71       |
| 15.0    | 65       |
| 16.5    | 60       |

| T/ $^{\circ}$ C | yield(%) |
|-----------------|----------|
| 57              | 30       |
| 60              | 58       |
| 62              | 71       |
| 65              | 78       |
